# Supplementary material for: Simultaneously enhancing the planarity and electron-donating capability of donors for through-space charge transfer TADF towards deep-red emission
Source: Royal Society of Chemistry journal article supplement (doi:10.1039/d3sc04264b), 2023-01-01
Supplement: d3sc04264b1.pdf [file d3sc04264b1.pdf]

*Electronic Supplementary Material*

**Simultaneously enhancing the planarity and electron-donating capability of donors for through-space charge transfer TADF towards deep-red emission**

Xiu-Fang Song,<sup>ab</sup> Chenglin Jiang,<sup>a</sup> Nengquan Li,<sup>a</sup> Jingsheng Miao,<sup>a</sup> Kai Li<sup>\*a</sup> and Chuluo Yang<sup>\*a</sup>

<sup>a</sup>Shenzhen Key Laboratory of New Information Display and Storage Materials, College of Materials Science and Engineering, Shenzhen University, Shenzhen 518055, China.

<sup>b</sup>College of Physics and Optoelectronic Engineering, Shenzhen University, Shenzhen 518060, China.

Email: [kaili@szu.edu.cn](mailto:kaili@szu.edu.cn); [clyang@szu.edu.cn](mailto:clyang@szu.edu.cn)

**Table of Contents**

|                                                        |    |
|--------------------------------------------------------|----|
| 1. General.....                                        | 2  |
| 2. Single Crystal Analysis .....                       | 3  |
| 3. Rate Constants Calculation .....                    | 3  |
| 4. Synthesis and Characterization .....                | 4  |
| 5. Computational Details.....                          | 8  |
| 6. Figures.....                                        | 9  |
| 7. Tables .....                                        | 13 |
| 8. References.....                                     | 16 |
| 9. NMR Spectra.....                                    | 18 |
| 10. Cartesian Coordinates of Optimized Structures..... | 21 |

## General

All chemicals and materials, unless otherwise noted, were commercially available and used without further purification. All solvents for reactions and photophysical measurements were of HPLC grade. The chemical 3-(3,6-di-*tert*-butyl-9*H*-carbazol-1-yl)dibenzo[*a,c*]phenazine (CQX) and 3,3'-(3,6-di-*tert*-butyl-9*H*-carbazole-1,8-diyl)dibibenzo[*a,c*]phenazine (C2QX) were prepared by following literature methods.<sup>1</sup>

<sup>1</sup>H and <sup>13</sup>C NMR spectra were recorded in CDCl<sub>3</sub> and CD<sub>2</sub>Cl<sub>2</sub> solvent on a 500 MHz spectrometer (Bruker Daltonics, Germany) using tetramethylsilane (TMS) as the internal standard. High-resolution mass spectrometry was performed on AB SCIEX TripleTOF 6600 (Singapore). Thermogravimetric analysis (TGA) was performed on a TGA-Q50 Instrument (TA Instruments, America) with a heating rate of 10 °C/min from 60 to 800 °C under an argon atmosphere.

UV-vis absorption spectra were obtained on a Shimadzu UV-2600 spectrophotometer (Shimadzu, Japan) at room temperature. Room-temperature photoluminescence spectra were measured on a Hitachi F-7100 fluorescence spectrophotometer (Hitachi, Japan). Phosphorescence spectra were measured for doped films (5% in mCBP) at 77 K. The doped film samples were prepared by spin-coating chlorobenzene solutions. The transient PL characteristics were measured by a single photon counting spectrometer (Picoquant, FluoTime 300, Germany). The solid-state absolute photoluminescence quantum yields (PLQYs) were measured on a Hamamatsu UV-NIR absolute PL quantum yield spectrometer (C13534, Hamamatsu Photonics) equipped with a calibrated integrating sphere under argon atmosphere. Cyclic voltammetry (CV) measurements were carried out on a CHI600 electrochemical analyzer (Chenhua, China) at room temperature, with a conventional three-electrode system consisting of a glassy carbon working electrode, a platinum wire auxiliary electrode, and an Ag/AgCl standard electrode which was used as the reference electrode. Dichloromethane and tetrabutylammonium hexafluorophosphate (0.1 M) were used as the solvent and supporting electrolyte, respectively. The sweep speed was set as 100 mV s<sup>-1</sup>.

## Single Crystal Analysis

X-ray single-crystal diffraction data of all compounds were recorded on a Bruker D8 Venture diffractometer using Cu K $\alpha$  radiation ( $\lambda = 1.54184 \text{ \AA}$ ). The crystal was kept at 100.0 K during data collection. Using Olex2,<sup>2</sup> the structure was determined with the ShelXT<sup>3</sup> structure solution program using intrinsic phasing and refined with the ShelXL refinement package using least-squares minimization. Full crystallographic information in CIF format has been deposited at the Cambridge Crystallographic Data Center (CCDC) under deposition number 2223327 and 2223328.

## Rate Constants Calculation

With the assumption  $k' = k_{nr,T} + k_{r,T} \ll k_{RISC}$  ( $k_{nr,T}$  and  $k_{r,T}$  represent the rate constants of nonradiative decay and radiative decay from T<sub>1</sub> to S<sub>0</sub> states, respectively) and usual  $k_p \gg k_d$  ( $k_p$  and  $k_d$  represent the decay rate constants for prompt and delayed fluorescence, respectively), the rate constants of radiative decay ( $k_{r,S}$ ) and nonradiative decay ( $k_{nr,S}$ ) from S<sub>1</sub> to S<sub>0</sub> states, the rate constants of intersystem crossing ( $k_{ISC}$ ) and reverse intersystem crossing ( $k_{RISC}$ ) between the S<sub>1</sub> and T<sub>1</sub> states were calculated from the following six equations:<sup>4</sup>

$$k_p = \frac{1}{\tau_p}$$

$$k_d = \frac{1}{\tau_d}$$

$$k_{r,S} = \phi_p k_p + \phi_d k_d \approx \phi_p k_p$$

$$k_{nr,S} = \frac{1 - \phi_{PL}}{\phi_{PL}} k_{r,S}$$

$$k_{RISC} \approx \frac{k_p k_d \phi_{PL}}{k_{r,S}}$$

$$k_{ISC} \approx \frac{k_p k_d \phi_d}{k_{RISC} \phi_p}$$

Where  $\tau_p$  and  $\tau_d$  represent the experimentally determined prompt and delayed fluorescence decay time constants, respectively;  $\phi_p$  and  $\phi_d$  represent the prompt and delayed fluorescence components in the PLQY ( $\phi_{PL}$ ), respectively, and can be experimentally determined from typical PLQY and transient PL characteristics.

## Synthesis and Characterization

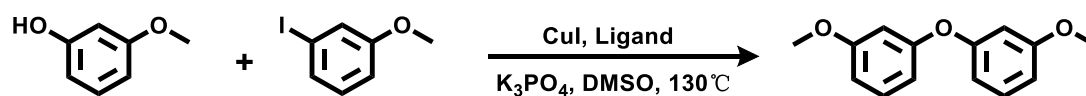

**3,3'-oxybis(methoxybenzene):** A mixture of CuI (813 mg, 4.27 mmol), pyridine-2-carboxylic acid (1.05 g, 8.54 mmol), 1-iodo-3-methoxybenzene (10.00 g, 42.7 mmol) and potassium phosphate (18.13 g, 85.4 mmol) was added to a 500 mL flame dried three-necked round bottom flask with a stirring bar. The flask was evacuated and filled with argon three times. DMSO (80 mL) and 3-methoxyphenol (51.3 mmol) were added under argon atmosphere. The reaction mixture was stirred at 130 °C for 48 h. The reaction mixture was cooled to room temperature and diluted with water (200 mL). The crude product was extracted with DCM (3 × 100 mL). The combined organic layers were washed with brine, dried over Na<sub>2</sub>SO<sub>4</sub>, concentrated in vacuo and the residue was purified on silica-gel column chromatography using petroleum ether/EtOAc (v/v=100/1) as the eluent to give a colorless oil in 80% yield. <sup>1</sup>H NMR (500 MHz, CDCl<sub>3</sub>) δ (ppm): 7.21 (t, *J* = 7.0, 6.5 Hz, 2H), 6.65 (ddd, *J* = 1.0, 1.0, 1.0, 0.5 Hz, 2H), 6.59 (m, 4H), 3.76 (s, 6H).

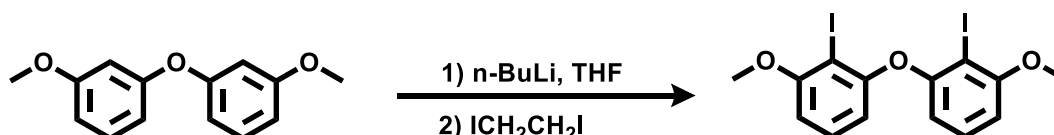

**3,3'-oxybis(2-iodo-1-methoxybenzene):** Under argon atmosphere, compound 3,3'-oxybis(methoxybenzene) (7.76 g, 33.7 mmol) was placed in a 250 mL dried two-necked round bottom flask with an ice/water bath. Tetrahydrofuran (40 mL) was added to the flask, then a 2.5 M hexane solution of n-butyllithium (30.6 mL, 76.5 mmol) was slowly added to the THF solution. After removing the ice/water bath, the mixture was stirred at room temperature for 2 h. Subsequently, the flask was placed into an ice/water bath again. A THF solution (40 mL) of 1,2-diiodo-ethane (21.00 g, 74.50 mmol) was slowly added to the mixture. The reaction was continued at room temperature for 4 h. Then the mixture was poured into 400 mL water and extracted with CH<sub>2</sub>Cl<sub>2</sub>. The organic layer was dried over sodium sulfate (Na<sub>2</sub>SO<sub>4</sub>), filtered, and concentrated under

reduced pressure. The resulting residue was washed with cold hexane to afford the desired compound as a white solid in 70% yield.  $^1\text{H NMR}$  (500 MHz,  $\text{CDCl}_3$ )  $\delta$  (ppm): 7.22 (t,  $J = 8.0, 8.5$  Hz, 2H), 6.62 (d,  $J = 8.0$  Hz, 2H), 6.42 (dd,  $J = 1.0, 0.5$  Hz, 2H), 3.93 (s, 6H).

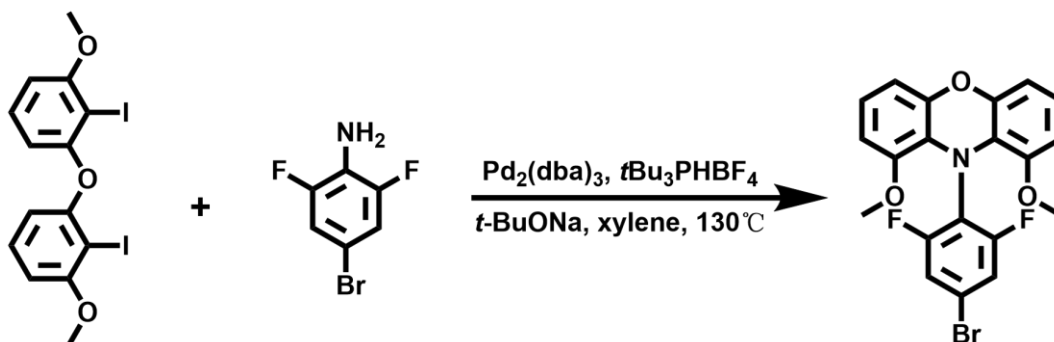

**10-(4-bromo-2,6-difluorophenyl)-1,9-dimethoxy-10H-phenoxazine:** Under argon atmosphere, a mixture of 3,3'-oxybis(2-iodo-1-methoxybenzene) (5.92 g, 12.28 mmol), 4-bromo-2,6-difluoroaniline (2.55 g, 12.28 mmol),  $\text{Pd}_2(\text{dba})_3$  (562 mg, 0.61 mmol),  $t\text{Bu}_3\text{PHBF}_4$  (356 mg, 1.23 mmol) and  $t\text{-BuONa}$  (3.54 g, 36.84 mmol) in 15 mL dry xylene was stirred and refluxed for 24 h. After cooling to room temperature, the crude product was filtered through a celite pad and washed with DCM. The collecting filtrate was evaporated to remove the solvent and the residue was passed through a column chromatography on silica gel using DCM/petroleum ether ( $v/v=1/8$ ) as the eluent to afford the product as a colorless powder (yield: 30%).  $^1\text{H NMR}$  (500 MHz,  $\text{CDCl}_3$ )  $\delta$  (ppm): 7.07 (d,  $J = 9.0$  Hz, 2H), 6.92 (t,  $J = 10.5, 10.5$  Hz, 2H), 6.56 (dd,  $J = 1.0, 1.5$  Hz, 2H), 6.44 (dd,  $J = 1.0, 1.0$  Hz, 2H), 3.67 (s, 6H).

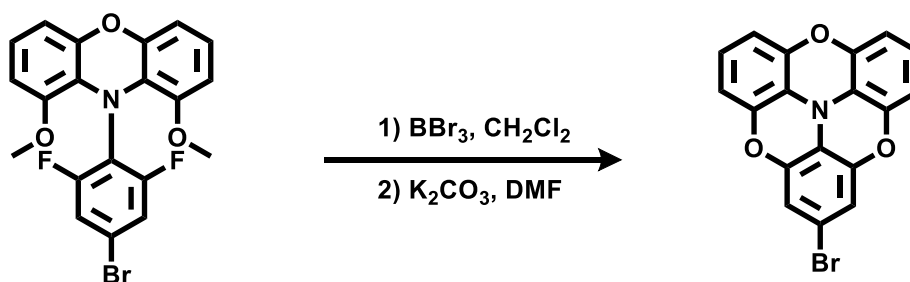

**2-bromo-4,8,12-trioxa-3a2-azadibenzo[cd,mn]pyrene (TPXZ-Br):** Under argon atmosphere, compound 10-(4-bromo-2,6-difluorophenyl)-1,9-dimethoxy-10H-phenoxazine (2.38 g, 5.49 mmol) was placed in a 250 mL two-necked flask. Dry  $\text{CH}_2\text{Cl}_2$  (100 mL) was added to the flask. The mixture was cooled and stirred at  $-30^\circ\text{C}$  for 30 min. Then boron tribromide ( $\text{BBr}_3$ ) (3.65 mL, 38.7 mmol)

was added and the mixture was stirred for 24 h as the mixture was allowed to rise to room temperature. After the reaction ended, the mixture was poured into 200 mL of water and extracted with  $\text{CH}_2\text{Cl}_2$ . The organic layer was dried over  $\text{Na}_2\text{SO}_4$ , filtered, and concentrated under reduced pressure. The residue was used in the next reaction without further purification.

Under argon atmosphere, the product of the previous step (2.17 g, crude, 3.64 mmol) and  $\text{K}_2\text{CO}_3$  (3.64 g, 26.40 mmol) were placed in a 250 mL two-necked flask. Dry DMF (100 mL) was added to the flask and the mixture was stirred at 100 °C for 12 h. After cooling to room temperature, the mixture was poured into 200 mL water and the resulting precipitate was collected by filtration. The precipitate was washed with water and EtOH to afford desired compound TPXZ-Br as a yellow solid (yield: 90%).  $^1\text{H}$  NMR (500 MHz,  $\text{CDCl}_3$ )  $\delta$  (ppm): 6.70 (t,  $J = 7.0$ , 7.0 Hz 2H), 6.61 (s, 2H), 6.45 (ddd,  $J = 1.0$ , 1.0, 0.5, 0.5 Hz, 4H).

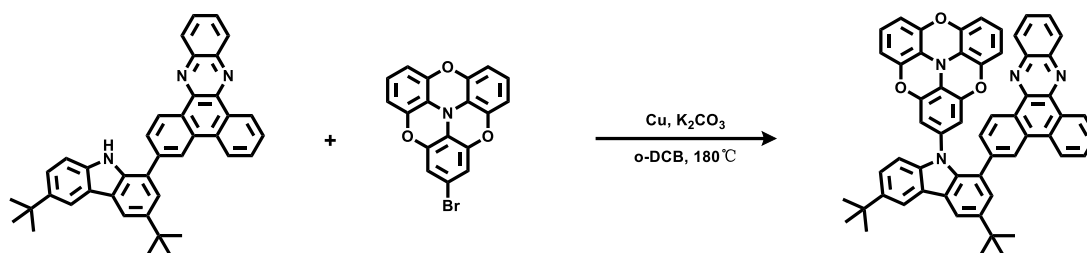

**TPXZ-QX:** A mixture of 3-(3,6-di-tert-butyl-9H-carbazol-1-yl)dibenzo[a,c]phenazine (CQX, 558 mg, 1.00 mmol), TPXZ-Br (366 mg, 1.00 mmol), Cu powder (192 mg, 3.00 mmol),  $\text{K}_2\text{CO}_3$  (415 mg, 3.00 mmol) in 10 mL dry o-dichlorobenzene was stirred and refluxed for 72 h under argon. After cooling to room temperature, the crude product was filtered through a celite pad and washed with DCM. The filtrate was concentrated to dryness. The collecting residue was purified by column chromatography on silica gel using DCM/petroleum ether ( $v/v=1/4$ ) as the eluent to afford the product as a black powder. Yield: 71%.  $^1\text{H}$  NMR (500 MHz,  $\text{CD}_2\text{Cl}_2$ )  $\delta$  (ppm): 9.31 (d,  $J = 10.5$  Hz, 1H), 9.05 (dd,  $J = 1.5$ , 1.0 Hz, 1H), 8.26 (m, 5H), 8.14 (m, 1H), 7.86 (pd,  $J = 2.0$ , 2.0, 2.0, 2.0, 2.0 Hz, 2H), 7.71 (dd,  $J = 1.5$ , 2.0 Hz, 1H), 7.66 (d,  $J = 2.5$  Hz, 1H), 7.56 (m, 1H), 7.49 (dd,  $J = 2.5$ , 2.5 Hz, 1H), 7.38 (t,  $J = 9.0$ , 9.0 Hz, 1H), 7.23 (d,  $J = 11.0$  Hz, 1H), 9.31 (d,  $J = 10.5$  Hz, 1H), 5.99 (m, 8H), 1.56 (s, 9H), 1.48 (s, 9H). The  $^{13}\text{C}$  NMR spectrum was not recorded due to its poor solubility. HRMS (ESI)  $m/z$ :  $[\text{M}+\text{H}]^+$  calcd. for  $\text{C}_{58}\text{H}_{42}\text{N}_4\text{O}_3$ , 843.3330; found 843.3319. Anal. Calcd (%) for  $\text{C}_{58}\text{H}_{42}\text{N}_4\text{O}_3$ : C, 82.64;

H, 5.02; N, 6.65. Found: C, 82.47; H, 4.80; N, 6.54.

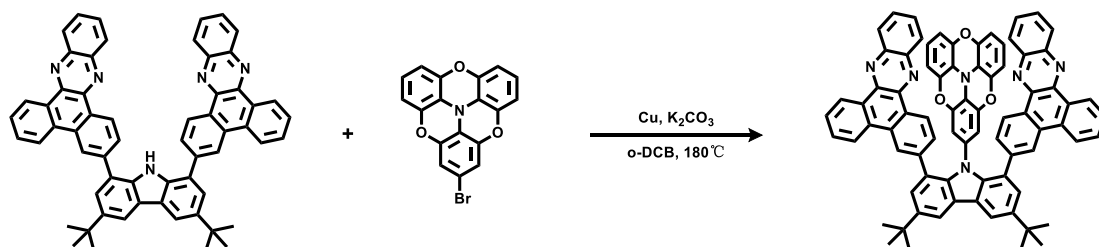

**TPXZ-2QX:** A mixture of 3,3'-(3,6-di-tert-butyl-9H-carbazole-1,8-diyl)didibenzo[a,c]phenazine (C2QX, 836 mg, 1.00 mmol), TPXZ-Br (366 mg, 1.00 mmol), Cu powder (192 mg, 3.00 mmol), K<sub>2</sub>CO<sub>3</sub> (415 mg, 3.00 mmol) in 10 mL dry o-dichlorobenzene was stirred and refluxed for 72 h under argon. After cooling to room temperature, the crude product was filtered through a celite pad and washed with DCM. The filtrate was concentrated to dryness. The collecting residue was purified by column chromatography on silica gel using DCM/petroleum ether (v/v=1/4) as the eluent to afford the product as a black powder. Yield: 60%. <sup>1</sup>H NMR (500 MHz, Tetrahydrofuran-d<sub>8</sub>) δ (ppm): 9.00 (m, 4H), 8.14 (m, 10H), 7.43 (m, 12H), 5.36 (m, 8H), 1.56 (s, 18H). The <sup>13</sup>C NMR spectrum was not recorded due to its poor solubility. HRMS (ESI) m/z: [M+H]<sup>+</sup> calcd. for C<sub>78</sub>H<sub>52</sub>N<sub>6</sub>O<sub>3</sub>, 1121.4174; found 1121.4174. Anal. Calcd (%) for C<sub>78</sub>H<sub>52</sub>N<sub>6</sub>O<sub>3</sub>: C, 83.55; H, 4.67; N, 7.49. Found: C, 83.89; H, 4.68; N, 7.43.

## Computational Details

The geometric optimization of ground-state ( $S_0$ ) and the excited states ( $S_1$  and  $T_1$ ) were carried out with density functional theory (DFT) and time-dependent DFT (TD-DFT) methods in *Gaussian16* package.<sup>5</sup> The MN15<sup>6</sup> functional and 6-31G(d,p)<sup>7,8</sup> basis set were used for all atoms. Dispersion interaction was described using the D3BJ scheme with the specified parameter developed by Grimme and coworkers.<sup>9-11</sup> The solvent effects of toluene were considered using the polarizable continuum model (PCM).<sup>12-14</sup> Frequency analyses of all optimized geometries were performed at the same computational level to confirm that all geometries are present on the potential energy surfaces as true minima. The hole and electron density distribution analyses were performed to characterize the nature of the electronic states with the Multiwfn 3.8\_dev package<sup>15,16</sup> and VMD 1.9.3 package<sup>17</sup>. The reduced density gradient (RDG)<sup>18</sup> was also analyzed by the Multiwfn 3.8\_dev package. The RDG distribution is divided into three colors including blue, green and red, which represents strong electrostatic interactions like hydrogen-bonding interactions, van der Waals interactions like dispersion interaction, and repulsion interactions like steric effects between the atom of the ring, respectively. Besides, the peaks in the region of  $\text{Sign}(\lambda_2)\rho < 0$ ,  $= 0$  and  $> 0$  of the scatter graphs are in the blue, green, and red, respectively.

Intramolecular symmetry-adapted perturbation theory (I-SAPT)<sup>19</sup> was used to quantitatively describe the intramolecular interactions between the selected fragments. The version of I-SAPT exploited here is based on zero-order SAPT (SAPT0),<sup>20</sup> which considers Hartree-Fock wavefunctions and describes dispersion terms within second-order perturbation theory. A truncated aug-cc-pVDZ basis set (jun-cc-pVDZ) was used because of its reliable results for intramolecular and intermolecular noncovalent interactions demonstrated by earlier investigations.<sup>21-24</sup> All the I-SAPT computations were carried out with the Psi4 code.<sup>25</sup>



## Figures

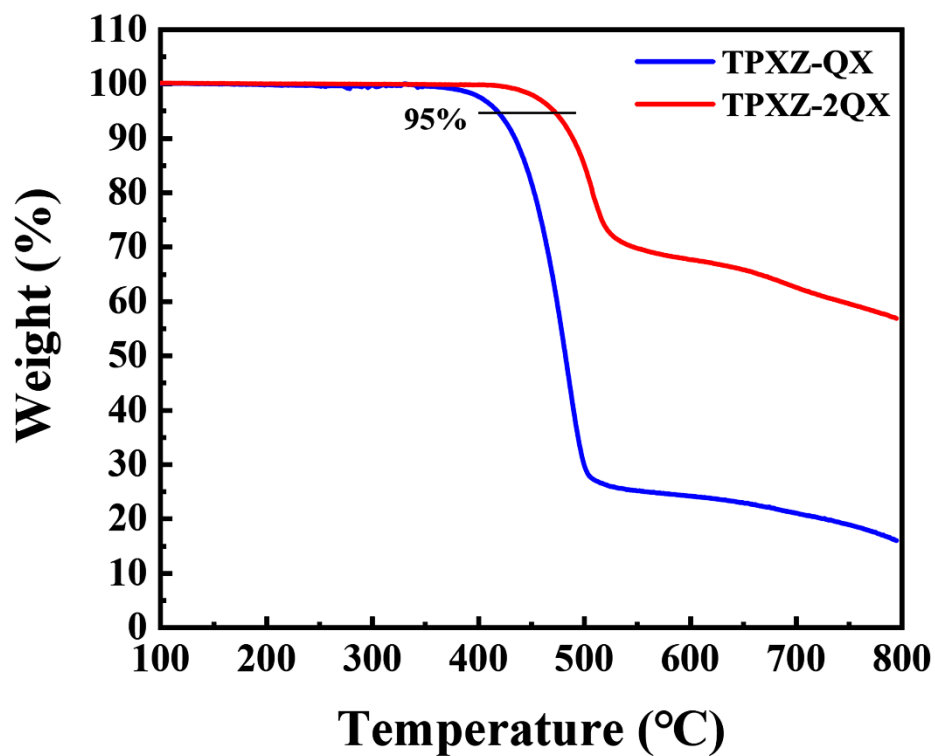

Fig. S1 Thermogravimetric (TGA) curves recorded for TPXZ-QX and TPXZ-2QX.

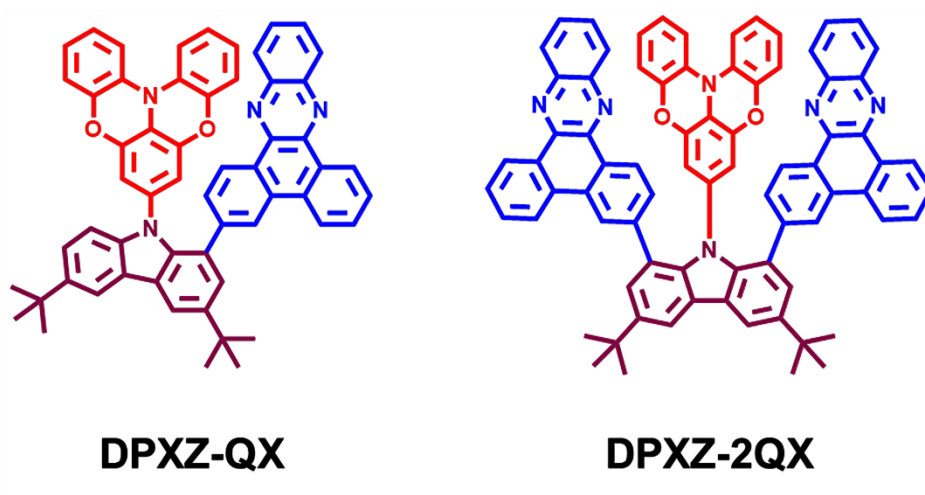

Fig. S2 Chemical structures of DPXZ-QX and DPXZ-2QX reported in reference.<sup>1</sup>

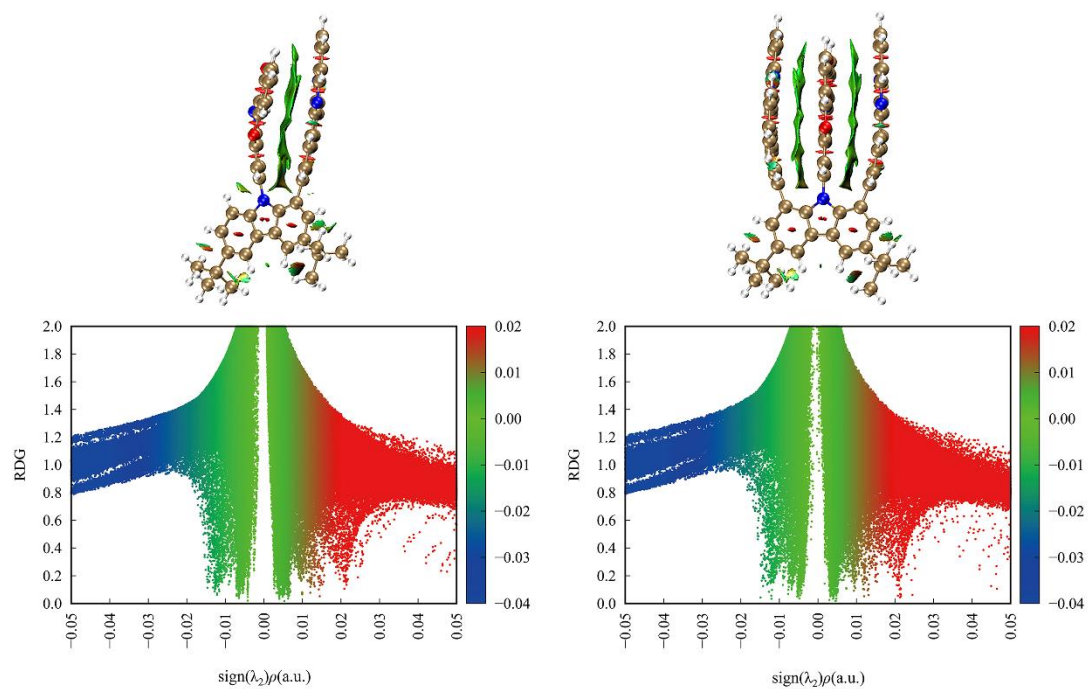

**Fig. S3** Reduced density gradient (RDG) isosurfaces (isosurface value: 0.6) and scatter graphs of TPXZ-QX (left) and TPXZ-2QX (right) at their optimized ground state geometries.

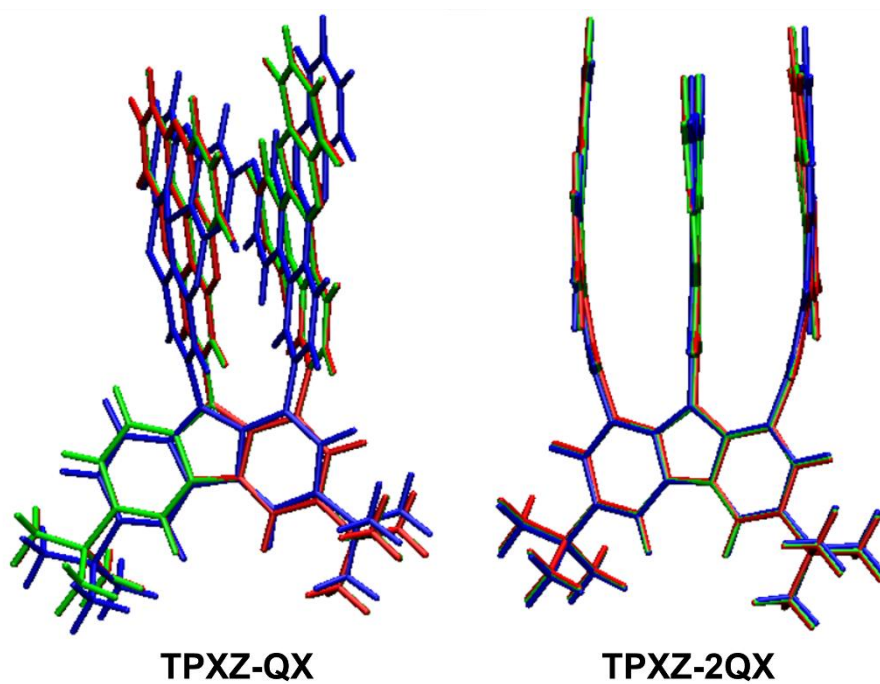

**Fig. S4** Overlap graphs of the optimized  $S_0$  (blue),  $S_1$  (red) and  $T_1$  (green) states of the TPXZ-QX and TPXZ-2QX.

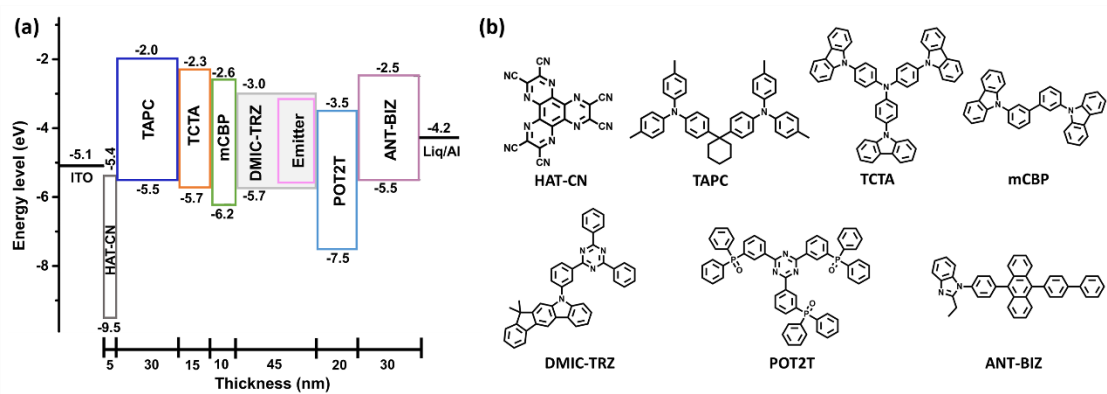

Fig. S5 (a) Device structure of the OLED doped with TPXZ-QX and TPXZ-2QX. (b) Chemical structures of the organic compounds used in the device fabrications.

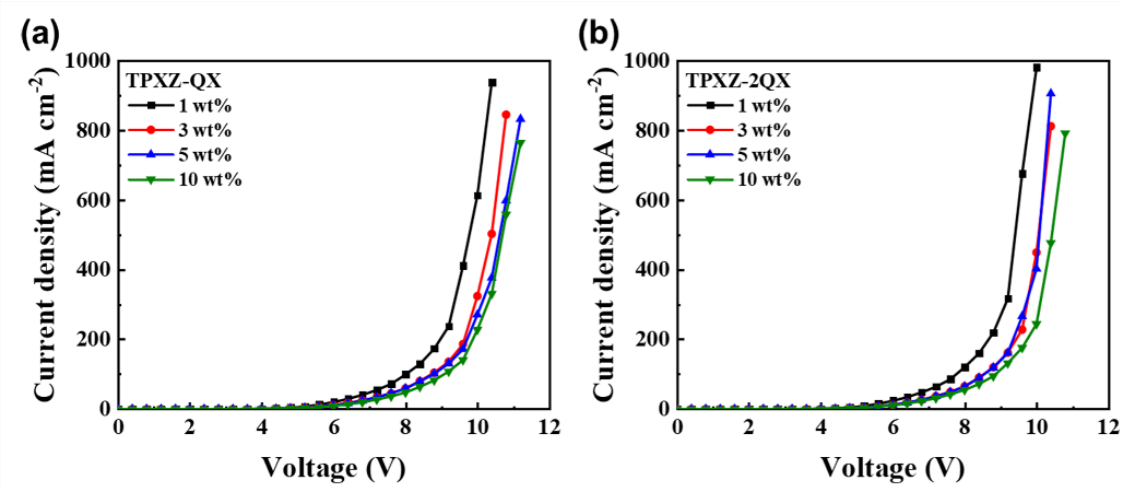

Fig. S6 (a) Current density-voltage curves of the devices doped with TPXZ-QX and TPXZ-2QX.

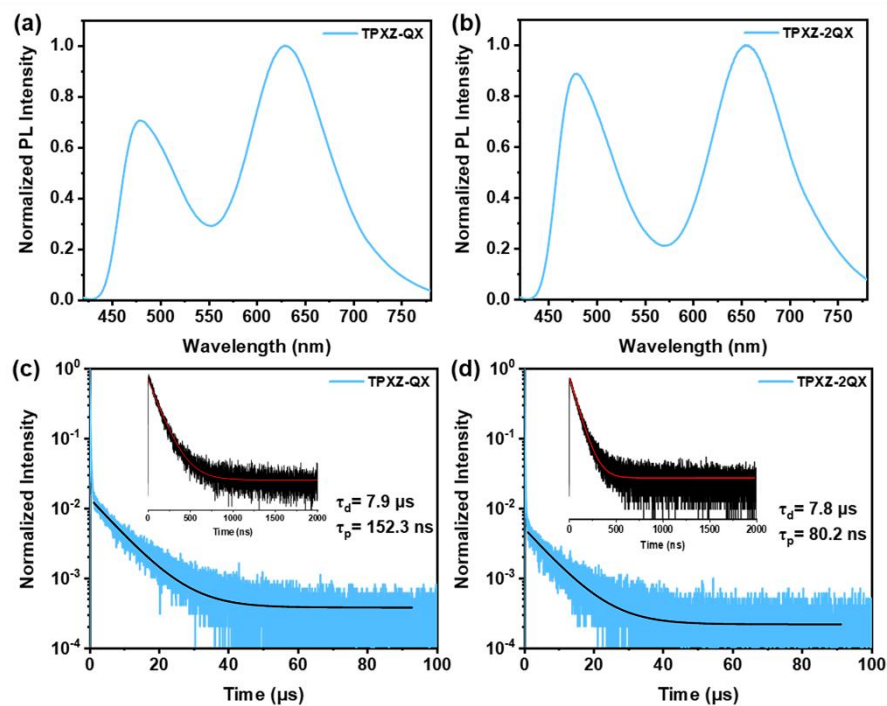

**Fig. S7** (a and b) Photoluminescence spectra and (c and d) transient characteristics of **TPXZ-QX** and **TPXZ-2QX** in doped DMIC-TRZ film (3 wt%).

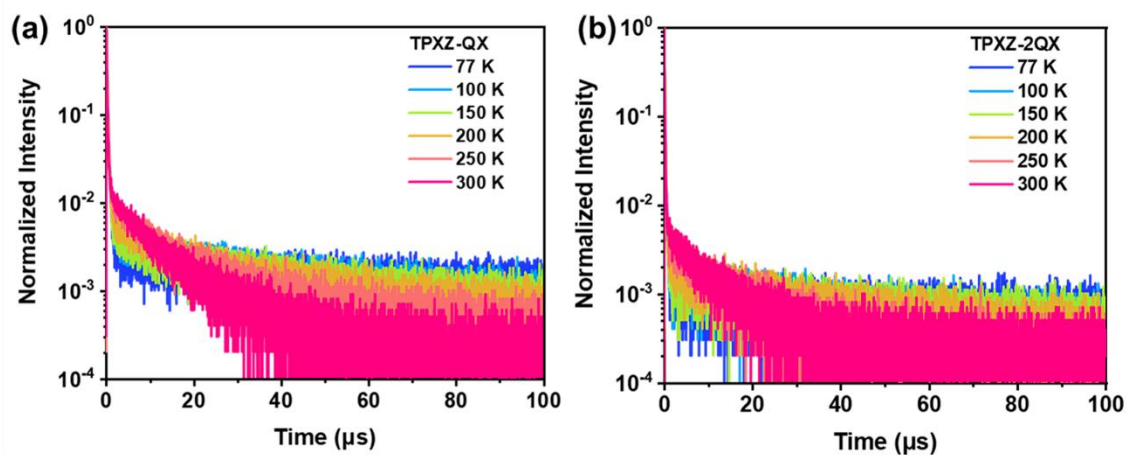

**Fig. S8** The temperature-dependent transient PL characteristics of **TPXZ-QX** and **TPXZ-2QX** in 3 wt % DMIC-TRZ film.

## Tables

**Table S1.** Crystallographic Data for **TPXZ-QX** and **TPXZ-2QX**.

| Compound                                         | TPXZ-QX                                                                                           | TPXZ-2QX                                                                            |
|--------------------------------------------------|---------------------------------------------------------------------------------------------------|-------------------------------------------------------------------------------------|
| <i>CCDC NO.</i>                                  | 2223327                                                                                           | 2223328                                                                             |
| <i>Formula</i>                                   | C <sub>58</sub> H <sub>42</sub> N <sub>4</sub> O <sub>3</sub> ·(CH <sub>2</sub> Cl <sub>2</sub> ) | C <sub>78</sub> H <sub>52</sub> N <sub>6</sub> O <sub>3</sub> ·(CHCl <sub>3</sub> ) |
| <i>Formula weight</i>                            | 927.88                                                                                            | 1240.62                                                                             |
| <i>Crystal system</i>                            | triclinic                                                                                         | monoclinic                                                                          |
| <i>Space group</i>                               | P-1                                                                                               | P2 <sub>1</sub> /n                                                                  |
| <i>a/Å</i>                                       | 11.9390(13)                                                                                       | 13.0796(4)                                                                          |
| <i>b/Å</i>                                       | 12.0965(11)                                                                                       | 32.0909(10)                                                                         |
| <i>c/Å</i>                                       | 17.2673(16)                                                                                       | 13.9618(4)                                                                          |
| <i>α/°</i>                                       | 103.388(8)                                                                                        | 90                                                                                  |
| <i>β/°</i>                                       | 108.096(9)                                                                                        | 97.426(2)                                                                           |
| <i>γ/°</i>                                       | 95.332(8)                                                                                         | 90                                                                                  |
| <i>Volume/Å<sup>3</sup></i>                      | 2269.0(4)                                                                                         | 5811.1(3)                                                                           |
| <i>Z</i>                                         | 2                                                                                                 | 4                                                                                   |
| <i>ρ<sub>calc</sub>/cm<sup>3</sup></i>           | 1.358                                                                                             | 1.418                                                                               |
| <i>μ/mm<sup>-1</sup></i>                         | 0.197                                                                                             | 1.914                                                                               |
| <i>F(000)</i>                                    | 968.0                                                                                             | 2576.0                                                                              |
| <i>Crystal size/mm<sup>3</sup></i>               | 0.35 × 0.26 × 0.18                                                                                | 0.12 × 0.08 × 0.05                                                                  |
| <i>2θ range (deg)</i>                            | 3.676-58.842                                                                                      | 6.954-125.156                                                                       |
| <i>GOF on F<sup>2</sup></i>                      | 1.032                                                                                             | 1.263                                                                               |
| <i>R<sub>1</sub>/wR<sub>2</sub> [I ≥ 2σ (I)]</i> | 0.0727/ 0.1914                                                                                    | 0.0947/ 0.2807                                                                      |

**Table S2.** Summary of the Excited State Kinetic Parameters of **TPXZ-QX** and **TPXZ-2QX** in Doped mCBP Films.

| Compound        | $\Phi_{PL}$<br>(%) | $\tau_p$<br>(ns) | $\tau_d$<br>( $\mu$ s) | $\Phi_p/\Phi_d$ | $k_{r,S}$<br>( $\times 10^6$ s $^{-1}$ ) | $k_{nr,S}$<br>( $\times 10^6$ s $^{-1}$ ) | $k_{ISC}$<br>( $\times 10^6$ s $^{-1}$ ) | $k_{RISC}$<br>( $\times 10^5$ s $^{-1}$ ) |
|-----------------|--------------------|------------------|------------------------|-----------------|------------------------------------------|-------------------------------------------|------------------------------------------|-------------------------------------------|
| <b>TPXZ-QX</b>  | 41                 | 94.4             | 6.9                    | 0.34/0.07       | 3.60                                     | 5.18                                      | 1.81                                     | 1.75                                      |
| <b>TPXZ-2QX</b> | 32                 | 42.2             | 7.2                    | 0.29/0.03       | 6.87                                     | 14.6                                      | 2.22                                     | 1.53                                      |

**Table S3.** Electronic Interaction Energies (kcal/mol) between Selected Fragments in **DPXZ-2QX**, **TPXZ-QX** and **TPXZ-2QX** at their  $S_0$ ,  $S_1$  and  $T_1$  minima by the I-SAPT Approach<sup>a</sup>

| Compound        | Frag 1 | Frag 2 | Minimum | Elst  | Exch  | Ind  | Disp   | Total |
|-----------------|--------|--------|---------|-------|-------|------|--------|-------|
| <b>DPXZ-2QX</b> | DPXZ   | 2QX    | $S_0$   | -22.3 | 80.2  | -7.4 | -76.3  | -25.8 |
|                 |        |        | $S_0$   | -13.0 | 45.6  | -4.0 | -43.5  | -15.0 |
| <b>TPXZ-QX</b>  | TPXZ   | QX     | $S_1$   | -17.3 | 55.3  | -5.1 | -50.2  | -17.3 |
|                 |        |        | $T_1$   | -19.3 | 60.0  | -5.4 | -52.5  | -17.2 |
| <b>TPXZ-2QX</b> | TPXZ   | 2QX    | $S_0$   | -27.9 | 97.2  | -8.7 | -93.8  | -33.1 |
|                 |        |        | $S_1$   | -31.5 | 105.4 | -9.2 | -98.6  | -33.9 |
|                 |        |        | $T_1$   | -34.4 | 112.2 | -9.8 | -101.6 | -33.7 |

<sup>a</sup>The total interaction energies between the two fragments are decomposed into four terms: electrostatics (Elst), exchange-repulsion (Exch), induction/polarization (Ind), and dispersion (Disp)

**Table S4.** Calculated Vertical Emission Energies ( $E_{\perp}$ , eV), Wavelength ( $\lambda$ , nm), Oscillator Strengths ( $f$ ) and Electronic Configurations at the  $S_1$  and  $T_1$  Minima and Available Experiment Data of Two Complexes in Toluene.

| Structure      | State | $E_{\perp}$ (eV) | $\lambda$ (nm) | $f$    | Configuration                      | Character | Exp. (eV) |
|----------------|-------|------------------|----------------|--------|------------------------------------|-----------|-----------|
| <b>TPXZ-QX</b> |       |                  |                |        |                                    |           |           |
| $S_1$ -MIN     | $S_1$ | 1.81             | 686            | 0.0113 | LUMO $\rightarrow$ HOMO<br>(98.9%) | $^1$ CT   | 1.83      |
| $T_1$ -MIN     | $T_1$ | 1.71             | 724            | -      | LUMO $\rightarrow$ HOMO<br>(96.0%) | $^3$ CT   | -         |

| TPXZ-2QX            |                |      |     |        |                      |                 |      |
|---------------------|----------------|------|-----|--------|----------------------|-----------------|------|
| S <sub>1</sub> -MIN | S <sub>1</sub> | 1.70 | 729 | 0.0103 | LUMO→HOMO<br>(99.2%) | <sup>1</sup> CT | 1.80 |
| T <sub>1</sub> -MIN | T <sub>1</sub> | 1.61 | 768 |        | LUMO→HOMO<br>(96.3%) | <sup>3</sup> CT |      |

**Table S5.** Related Energies (eV) of the S<sub>1</sub>, T<sub>1</sub> and T<sub>2</sub> States and Their Electronic Characteristics at the S<sub>0</sub>, S<sub>1</sub> and T<sub>1</sub> Minima of Two Complexes in Toluene Solution.

| Structure           | S <sub>0</sub> |        | S <sub>1</sub>  |        | T <sub>1</sub>  |        | T <sub>2</sub>   |  |
|---------------------|----------------|--------|-----------------|--------|-----------------|--------|------------------|--|
|                     | Energy         | Energy | Character       | Energy | Character       | Energy | Character        |  |
| TPXZ-QX             |                |        |                 |        |                 |        |                  |  |
| S <sub>0</sub> -MIN | 0.00           | 2.58   | <sup>1</sup> CT | 2.46   | <sup>3</sup> LE | 2.57   | <sup>3</sup> CT  |  |
| S <sub>1</sub> -MIN | 0.27           | 2.08   | <sup>1</sup> CT | 2.01   | <sup>3</sup> CT | 2.44   | <sup>3</sup> LE  |  |
| T <sub>1</sub> -MIN | 0.29           | 2.09   | <sup>1</sup> CT | 2.00   | <sup>3</sup> CT | 2.44   | <sup>3</sup> LE  |  |
| TPXZ-2QX            |                |        |                 |        |                 |        |                  |  |
| S <sub>0</sub> -MIN | 0.00           | 2.13   | <sup>1</sup> CT | 2.05   | <sup>3</sup> CT | 2.09   | <sup>3</sup> CT' |  |
| S <sub>1</sub> -MIN | 0.22           | 1.92   | <sup>1</sup> CT | 1.85   | <sup>3</sup> CT | 2.18   | <sup>3</sup> CT' |  |
| T <sub>1</sub> -MIN | 0.23           | 1.93   | <sup>1</sup> CT | 1.84   | <sup>3</sup> CT | 2.19   | <sup>3</sup> CT' |  |

**Table S6.** Device Data of the Doped Red TSCT-TADF OLEDs ( $\lambda_{\max} \geq 580$  nm) Based on Selected Representative Emitters in the Literature and Comparison with This Work.

| Emitter                  | EQE <sub>max</sub><br>[%] | EQE <sub>1000cd m<sup>-2</sup></sub><br>[%] | $\lambda_{EL,max}$<br>[nm] | Ref.      |
|--------------------------|---------------------------|---------------------------------------------|----------------------------|-----------|
| <b>TPXZ-2QX (1 wt%)</b>  | 11.4                      | 7.7                                         | 665                        | This work |
| <b>TPXZ-QX (1 wt%)</b>   | 13.8                      | 11.7                                        | 632                        | This work |
| <b>SAF36DCPP</b>         | 16.12                     | 10.32                                       | 604                        | [26]      |
| <b>SAF27DCPP</b>         | 11.8                      | 6.14                                        | 604                        | [26]      |
| <b>DPXZ-2QX (6 wt%)</b>  | 23.2                      | 14.4                                        | 609                        | [1]       |
| <b>DPXZ-2QX (12 wt%)</b> | 21.1                      | 18.9                                        | 616                        | [1]       |
| <b>RD-2TF</b>            | 10.3                      | 7.8                                         | 626                        | [27]      |
| <b>P5-05</b>             | 1.0                       | 0.3                                         | 616                        | [28]      |

## References

1. C. Jiang, J. Miao, D. Zhang, Z. Wen, C. Yang and K. Li, *Research*, 2022, 2022, 9892802.
2. O. V. Dolomanov, L. J. Bourhis, R. J. Gildea, J. A. K. Howard and H. Puschmann, *J. Appl. Cryst.*, 2009, **42**, 339-341.
3. G. M. Sheldrick, *Acta. Cryst.*, 2015, **A71**, 3-8.
4. K.-C. Pan, S.-W. Li, Y.-Y. Ho, Y.-J. Shiu, W.-L. Tsai, M. Jiao, W.-K. Lee, C.-C. Wu, C.-L. Chung, T. Chatterjee, Y.-S. Li, K.-T. Wong, H.-C. Hu, C.-C. Chen and M.-T. Lee, *Adv. Funct. Mater.*, 2016, **26**, 7560-7571.
5. M. J. Frisch, G. W. Trucks, H. B. Schlegel, G. E. Scuseria, M. A. Robb, J. R. Cheeseman, G. Scalmani, V. Barone, G. A. Petersson, H. Nakatsuji, X. Li, M. Caricato, A. V. Marenich, J. Bloino, B. G. Janesko, R. Gomperts, B. Mennucci, H. P. Hratchian, J. V. Ortiz, A. F. Izmaylov, J. L. Sonnenberg, D. Williams-Young, F. Ding, F. Lipparini, F. Egidi, J. Goings, B. Peng, A. Petrone, T. Henderson, D. Ranasinghe, V. G. Zakrzewski, J. Gao, N. Rega, G. Zheng, W. Liang, M. Hada, M. Ehara, K. Toyota, R. Fukuda, J. Hasegawa, M. Ishida, T. Nakajima, Y. Honda, O. Kitao, H. Nakai, T. Vreven, K. Throssell, J. A. Montgomery, Jr., J. E. Peralta, F. Ogliaro, M. J. Bearpark, J. J. Heyd, E. N. Brothers, K. N. Kudin, V. N. Staroverov, T. A. Keith, R. Kobayashi, J. Normand, K. Raghavachari, A. P. Rendell, J. C. Burant, S. S. Iyengar, J. Tomasi, M. Cossi, J. M. Millam, M. Klene, C. Adamo, R. Cammi, J. W. Ochterski, R. L. Martin, K. Morokuma, O. Farkas, J. B. Foresman, and D. J. Fox, *Gaussian 16 Revision C.01*, Gaussian, Inc., Wallingford CT, 2019.
6. S. Y. Haoyu, X. He, S. L. Li and D. G. Truhlar, *Chem. Sci.*, 2016, **7**, 5032-5051.
7. G. A. Petersson, A. Bennett, T. G. Tensfeldt, M. A. Al-Laham, W. A. Shirley and J. Mantzaris, *J. Chem. Phys.*, 1988, **89**, 2193-2218.
8. G. A. Petersson and M. A. Al-Laham, *J. Chem. Phys.*, 1991, **94**, 6081-6090.
9. S. Grimme, J. Antony, S. Ehrlich and H. Krieg, *J. Chem. Phys.*, 2010, **132**, 154104.
10. S. Grimme, S. Ehrlich and L. Goerigk, *J. Comput. Chem.*, 2011, **32**, 1456-1465.
11. L. Goerigk, A. Hansen, C. Bauer, S. Ehrlich, A. Najibi and S. Grimme, *Phys. Chem. Chem. Phys.*, 2017, **19**, 32184-32215.
12. S. Miertuš, E. Scrocco, and J. Tomasi, *Chem. Phys.*, 1981, **55**, 117-129.
13. S. Miertuš and J. Tomasi, *Chem. Phys.*, 1982, **65**, 239-245.



14. J. L. Pascual-Ahuir, E. Silla and I. Tuñón, *J. Comput. Chem.*, 1994, **15**, 1127-1138.
15. Z. Liu, T. Lu and Q. Chen, *Carbon*, 2020, **165**, 461-467.
16. T. Lu and F. Chen, *J. Comput. Chem.*, 2012, **33**, 580-592.
17. W. Humphrey, A. Dalke and K. Schulten, *J. Molec. Graph.*, 1996, **14**, 33-38.
18. E. R. Johnson, S. Keinan, P. Mori-Sánchez, J. Contreras-García, A. J. Cohen and W. Yang, *J. Am. Chem. Soc.*, 2010, **132**, 6498-6506.
19. R.M. Parrish, J.F. Gonthier, C. Corminboeuf and C.D. Sherrill, *J. Chem. Phys.*, 2015, **143**, 051103,
20. E. G. Hohenstein and C. D. Sherrill, *J. Chem. Phys.*, 2010, **133**, 104107.
21. E. Papajak, J. Zheng, X. Xu, H. R. Leverentz and D. G. Truhlar, *J. Chem. Theory. Comput.*, 2011, **7**, 3027-3034.
22. B. W. Bakr and C. D. Sherrill, *Phys. Chem. Chem. Phys.*, 2016, **18**, 10297-10308.
23. X.-K. Chen, B. W. Bakr, M. Auffray, Y. Tsuchiya, C. D. Sherrill, C. Adachi and J.-L. Bredas, *J. Phys. Chem. Lett.*, 2019, **10**, 3260-3268.
24. C. Sutton, M. S. Marshall, C. D. Sherrill, C. Risko and J.-L. Brédas, *J. Am. Chem. Soc.*, 2015, **137**, 8775-8782.
25. J. M. Turney, A. C. Simmonett, R. M. Parrish, E. G. Hohenstein, F. A. Evangelista, J. T. Fermann, B. J. Mintz, L. A. Burns, J. J. Wilke, M. L. Abrams, N. J. Russ, M. L. Leininger, C. L. Janssen, E. T. Seidl, W. D. Allen, H. F. Schaefer, R. A. King, E. F. Valeev, C. D. Sherrill and T. D. Crawford, *Wiley Interdiscip. Rev.: Comput. Mol. Sci.*, 2012, **2**, 556-565.
26. Y.-J. Yu, M. Song, X.-Y. Meng, Y.-K. Qu, X.-Q. Wang, L. Chen, S.-Y. Yang, D.-Y. Zhou, Z.-Q. Jiang and L.-S. Liao, *Org. Lett.*, 2023, **25**, 6024-6028.
27. X. Wang, J. Hu, J. Lv, Q. Yang, H. Tian, S. Shao, L. Wang, X. Jing and F. Wang, *Angew. Chem. Int. Ed.*, 2021, **60**, 16585-16593.
28. J. Hu, Q. Li, X. Wang, S. Shao, L. Wang, X. Jing and F. Wang, *Angew. Chem. Int. Ed.*, 2019, **58**, 8405-8409.

# NMR Spectra

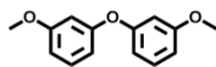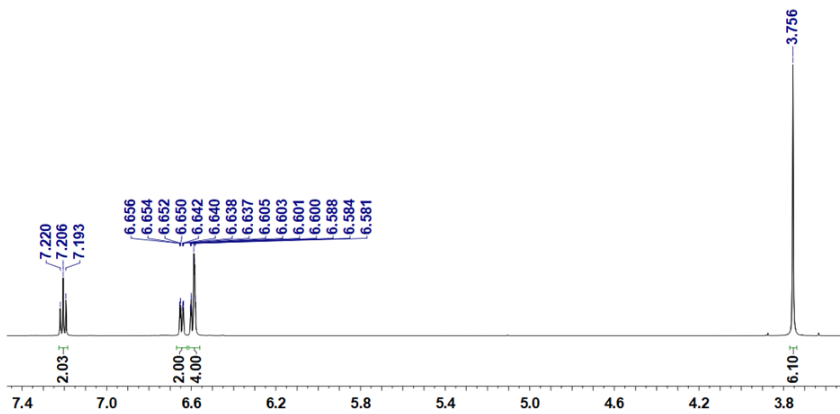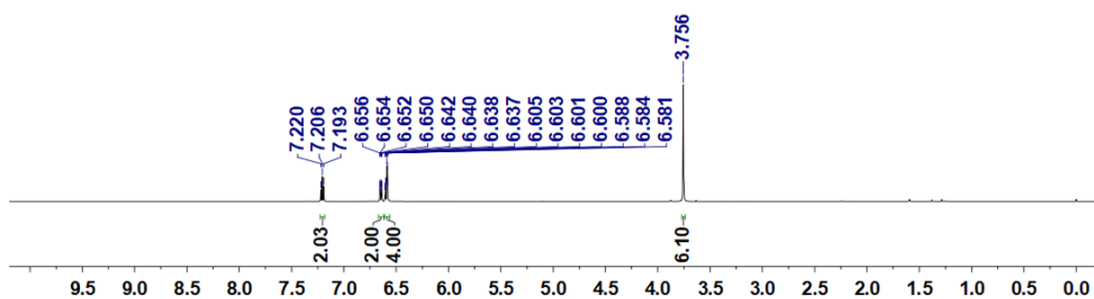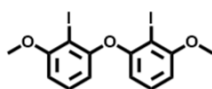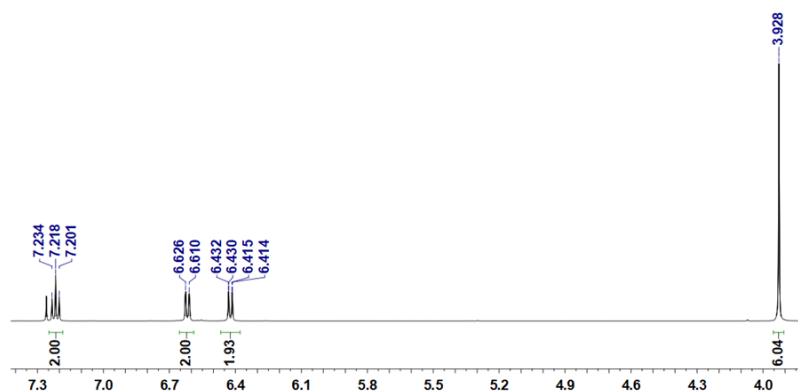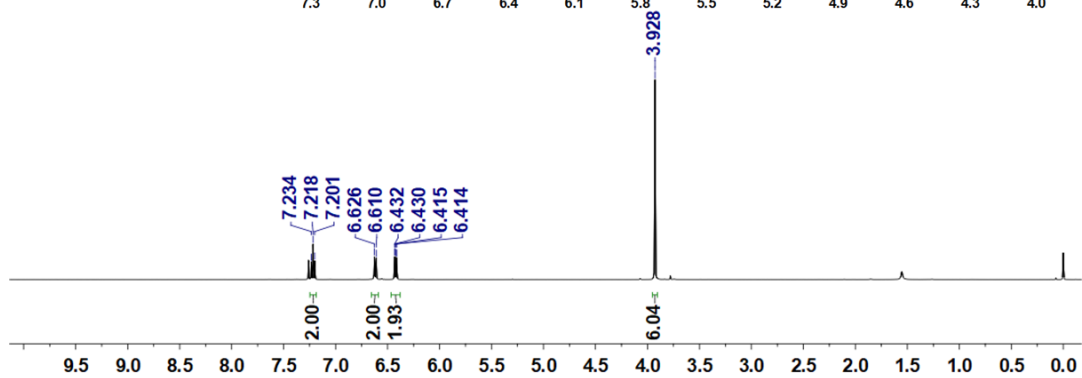

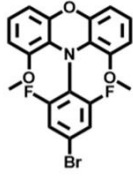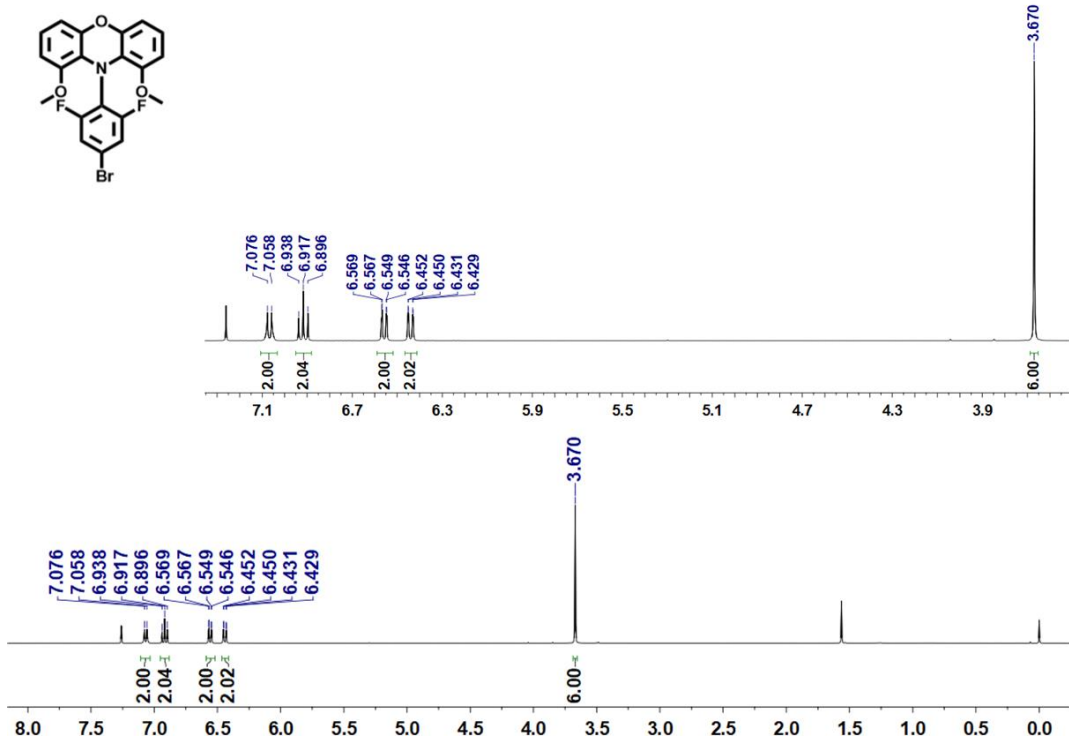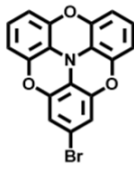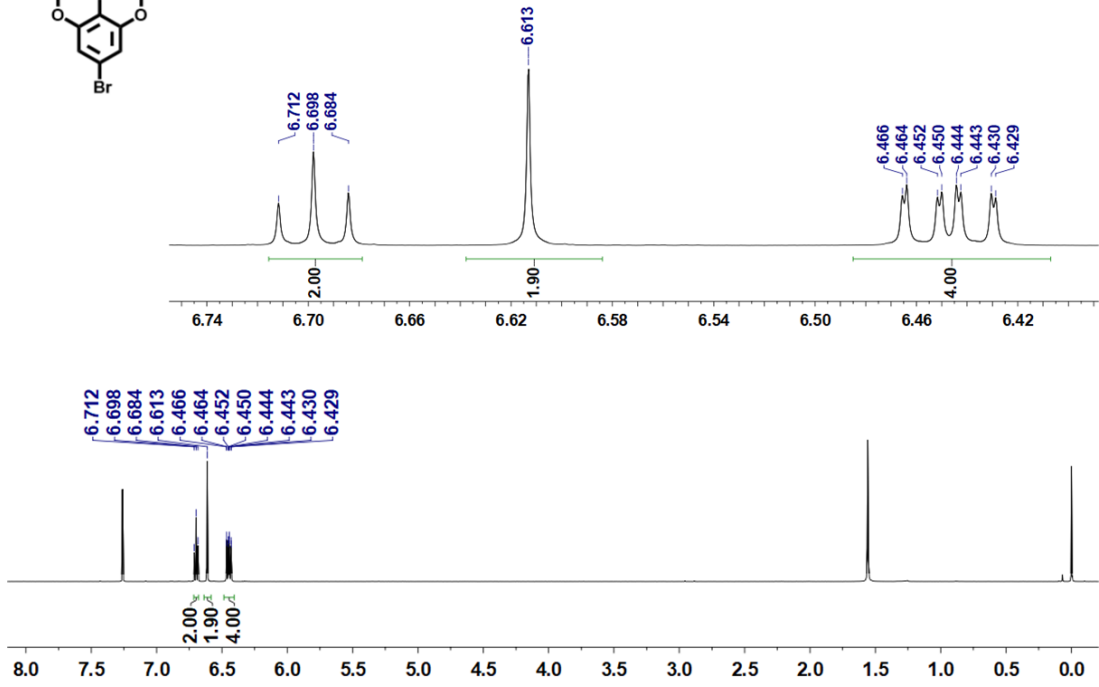

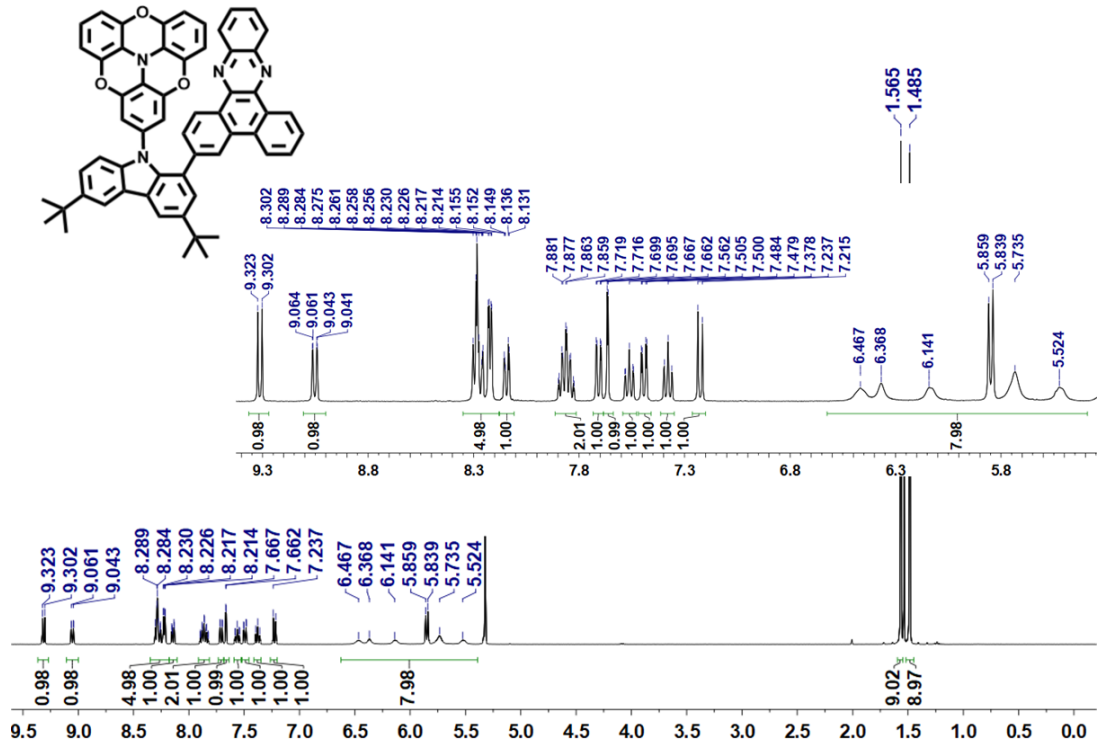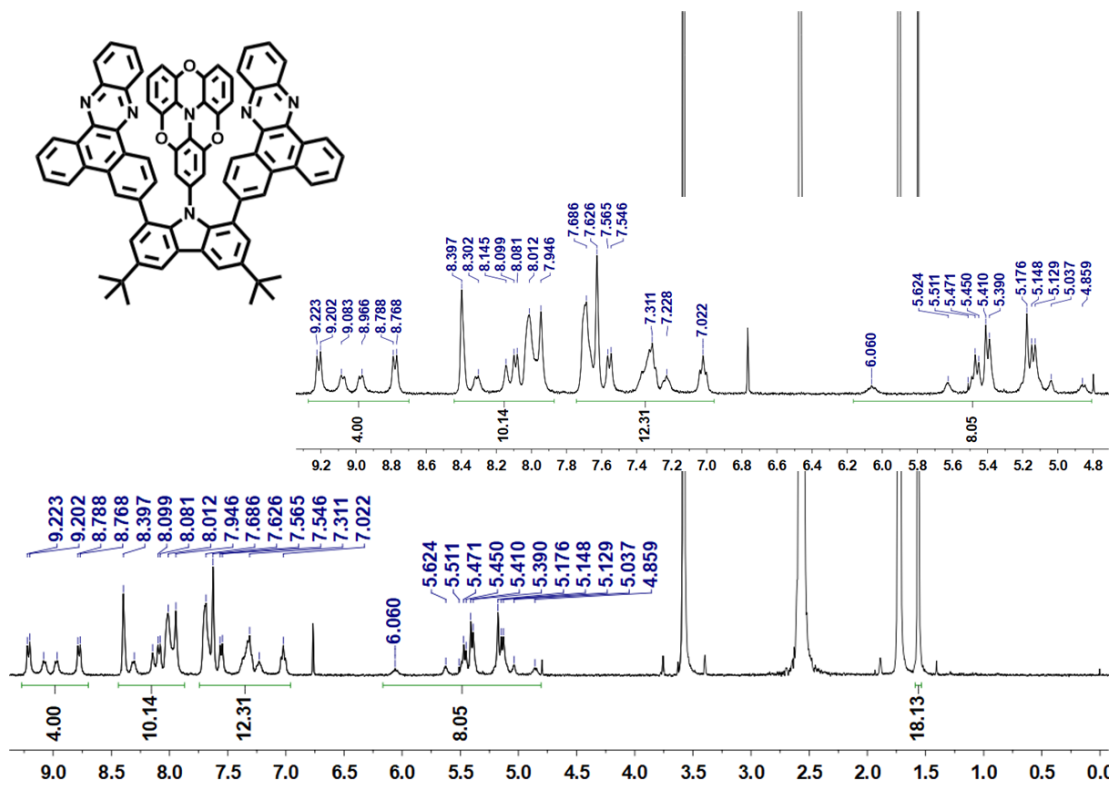

## Cartesian Coordinates of Optimized Structures

In xyz format (unit: Angstrom)

### TPXZ-QX

S0-MIN -2677.16522266 Hartree

|   |              |              |              |
|---|--------------|--------------|--------------|
| O | 0.908286000  | -3.324779000 | 0.440599000  |
| O | 1.103342000  | 0.259759000  | -2.760097000 |
| N | -2.909391000 | -0.446250000 | -0.217523000 |
| N | 5.150784000  | 0.352064000  | 1.350633000  |
| N | 3.960005000  | 2.444737000  | -0.104990000 |
| N | 2.374410000  | -1.816524000 | -1.397530000 |
| C | -5.197772000 | -0.378647000 | -0.182163000 |
| C | 0.975610000  | 0.885769000  | 1.403832000  |
| C | -4.072637000 | -1.204307000 | -0.381643000 |
| C | 1.609449000  | -0.139819000 | 2.252241000  |
| C | -0.418005000 | 1.041218000  | 1.344915000  |
| H | -1.068003000 | 0.396016000  | 1.928241000  |
| C | 3.231597000  | 1.604396000  | 0.614039000  |
| C | -3.191299000 | 3.207479000  | 0.576851000  |
| H | -2.589807000 | 4.089509000  | 0.793537000  |
| C | 3.014457000  | -0.286694000 | 2.251013000  |
| C | 3.843522000  | 0.560691000  | 1.388419000  |
| C | -5.343161000 | 2.166596000  | 0.340562000  |
| H | -6.429393000 | 2.192445000  | 0.341433000  |
| C | -4.596656000 | 3.322037000  | 0.561678000  |
| C | -1.609982000 | -0.878630000 | -0.593614000 |
| C | -0.921801000 | -0.167721000 | -1.580812000 |
| H | -1.390355000 | 0.662469000  | -2.099312000 |
| C | -1.022964000 | 1.973378000  | 0.505000000  |
| C | -3.284586000 | 0.870961000  | 0.088035000  |
| C | -4.693972000 | 0.950934000  | 0.100805000  |
| C | -2.502686000 | 2.009778000  | 0.377906000  |
| C | 1.773005000  | 1.741229000  | 0.609031000  |
| C | 0.858225000  | -0.994943000 | 3.080839000  |
| H | -0.224614000 | -0.924894000 | 3.097142000  |
| C | 0.408526000  | -0.471975000 | -1.824521000 |
| C | 2.289873000  | -3.355486000 | 0.471149000  |
| C | -1.007250000 | -1.942422000 | 0.084949000  |

|   |              |              |              |
|---|--------------|--------------|--------------|
| H | -1.533974000 | -2.478041000 | 0.868863000  |
| C | 0.311961000  | -2.268493000 | -0.211199000 |
| C | -6.481847000 | -0.913465000 | -0.297463000 |
| H | -7.345525000 | -0.269024000 | -0.139799000 |
| C | -0.211980000 | 2.835624000  | -0.253968000 |
| H | -0.679205000 | 3.563345000  | -0.913322000 |
| C | 1.027038000  | -1.521980000 | -1.145499000 |
| C | 1.166385000  | 2.715664000  | -0.201162000 |
| H | 1.810468000  | 3.349630000  | -0.802833000 |
| C | 2.482484000  | 0.231240000  | -2.687108000 |
| C | 5.898576000  | 1.173221000  | 0.578097000  |
| C | -4.217164000 | -2.548381000 | -0.719261000 |
| C | -5.234505000 | 4.691758000  | 0.808998000  |
| C | 5.299094000  | 2.256274000  | -0.129743000 |
| C | 3.127818000  | -0.792188000 | -1.996830000 |
| C | 3.218676000  | 1.216813000  | -3.334594000 |
| H | 2.691472000  | 2.001397000  | -3.867123000 |
| C | 3.629867000  | -1.236547000 | 3.082213000  |
| H | 4.711292000  | -1.319607000 | 3.047353000  |
| C | 2.931323000  | -4.192364000 | 1.375457000  |
| H | 2.331024000  | -4.793639000 | 2.050271000  |
| C | 1.474976000  | -1.932406000 | 3.895994000  |
| H | 0.868180000  | -2.573592000 | 4.529387000  |
| C | -6.658411000 | -2.262998000 | -0.617770000 |
| C | 3.032804000  | -2.581499000 | -0.418976000 |
| C | 7.298305000  | 0.951860000  | 0.461272000  |
| H | 7.724246000  | 0.111476000  | 1.001384000  |
| C | -5.510815000 | -3.054331000 | -0.827797000 |
| H | -5.624553000 | -4.102198000 | -1.087160000 |
| C | -4.827942000 | 5.209839000  | 2.198852000  |
| H | -5.164886000 | 4.523273000  | 2.983274000  |
| H | -5.281644000 | 6.191801000  | 2.380729000  |
| H | -3.741778000 | 5.319879000  | 2.287086000  |
| C | 4.424487000  | -2.577803000 | -0.349544000 |
| C | 6.117532000  | 3.117457000  | -0.910874000 |
| H | 5.632545000  | 3.934680000  | -1.437056000 |
| C | 4.326925000  | -4.212760000 | 1.409513000  |
| H | 4.834531000  | -4.862462000 | 2.115678000  |
| C | 2.870480000  | -2.048184000 | 3.907803000  |

|   |              |              |              |
|---|--------------|--------------|--------------|
| H | 3.354335000  | -2.782148000 | 4.546241000  |
| C | -6.763765000 | 4.633374000  | 0.748408000  |
| H | -7.114682000 | 4.289113000  | -0.231299000 |
| H | -7.173139000 | 5.635142000  | 0.920110000  |
| H | -7.172091000 | 3.967504000  | 1.517399000  |
| C | 5.079599000  | -3.394842000 | 0.565627000  |
| H | 6.164060000  | -3.381673000 | 0.595978000  |
| C | 4.520130000  | -0.808144000 | -1.912930000 |
| C | 4.612035000  | 1.163917000  | -3.284269000 |
| H | 5.196496000  | 1.929857000  | -3.784404000 |
| C | -8.079172000 | -2.826626000 | -0.733113000 |
| C | 8.061271000  | 1.786413000  | -0.317132000 |
| H | 9.130360000  | 1.617612000  | -0.409939000 |
| C | 5.270090000  | 0.162680000  | -2.567898000 |
| H | 6.352326000  | 0.138726000  | -2.478667000 |
| C | 7.466441000  | 2.882858000  | -1.003833000 |
| H | 8.091972000  | 3.533475000  | -1.608490000 |
| C | -4.748651000 | 5.684283000  | -0.260636000 |
| H | -3.659741000 | 5.801106000  | -0.237014000 |
| H | -5.196777000 | 6.670594000  | -0.089001000 |
| H | -5.032892000 | 5.345672000  | -1.263066000 |
| C | -8.848042000 | -2.064513000 | -1.825481000 |
| H | -9.868483000 | -2.457752000 | -1.911661000 |
| H | -8.353027000 | -2.172804000 | -2.796789000 |
| H | -8.917500000 | -0.995448000 | -1.597311000 |
| C | -8.089851000 | -4.315418000 | -1.093839000 |
| H | -9.126416000 | -4.664419000 | -1.161552000 |
| H | -7.581409000 | -4.919049000 | -0.333224000 |
| H | -7.609762000 | -4.499983000 | -2.061724000 |
| C | -8.810206000 | -2.654064000 | 0.608945000  |
| H | -8.876783000 | -1.599468000 | 0.897553000  |
| H | -8.288536000 | -3.192268000 | 1.408025000  |
| H | -9.831006000 | -3.048968000 | 0.535440000  |
| O | 5.170869000  | -1.798050000 | -1.208530000 |
| H | -3.352585000 | -3.181471000 | -0.896911000 |

S1-MIN -2677.08894383 Hartree

|   |             |              |              |
|---|-------------|--------------|--------------|
| O | 1.217944000 | -2.879005000 | 0.939170000  |
| O | 1.415468000 | 0.644241000  | -2.324312000 |

|   |              |              |              |
|---|--------------|--------------|--------------|
| N | -2.734035000 | -0.374941000 | -0.116571000 |
| N | 4.791671000  | 0.369015000  | 1.164564000  |
| N | 3.610369000  | 2.613120000  | -0.166947000 |
| N | 2.682178000  | -1.349433000 | -0.862149000 |
| C | -5.000348000 | -0.649910000 | -0.323764000 |
| C | 0.699640000  | 1.273119000  | 1.712019000  |
| C | -3.754496000 | -1.307487000 | -0.366416000 |
| C | 1.346126000  | 0.273830000  | 2.553362000  |
| C | -0.700792000 | 1.398832000  | 1.638235000  |
| H | -1.334564000 | 0.732200000  | 2.219224000  |
| C | 2.917466000  | 1.831481000  | 0.690179000  |
| C | -3.642102000 | 3.203199000  | 0.563397000  |
| H | -3.204871000 | 4.164286000  | 0.830654000  |
| C | 2.725961000  | 0.001696000  | 2.356265000  |
| C | 3.511665000  | 0.747858000  | 1.382294000  |
| C | -5.577083000 | 1.853195000  | 0.099153000  |
| H | -6.648275000 | 1.716919000  | -0.019816000 |
| C | -5.037589000 | 3.107096000  | 0.378122000  |
| C | -1.367624000 | -0.645863000 | -0.348738000 |
| C | -0.655874000 | 0.113379000  | -1.289483000 |
| H | -1.143788000 | 0.897715000  | -1.856815000 |
| C | -1.315959000 | 2.255028000  | 0.735473000  |
| C | -3.337191000 | 0.883650000  | 0.101119000  |
| C | -4.731379000 | 0.746739000  | -0.038751000 |
| C | -2.768757000 | 2.120238000  | 0.468773000  |
| C | 1.489119000  | 2.064584000  | 0.836614000  |
| C | 0.644967000  | -0.473008000 | 3.525119000  |
| H | -0.404763000 | -0.261559000 | 3.709937000  |
| C | 0.702286000  | -0.106421000 | -1.437431000 |
| C | 2.560304000  | -3.092590000 | 0.787413000  |
| C | -0.750309000 | -1.668662000 | 0.387908000  |
| H | -1.302611000 | -2.226924000 | 1.136163000  |
| C | 0.602360000  | -1.902789000 | 0.211313000  |
| C | -6.174713000 | -1.366009000 | -0.554589000 |
| H | -7.131480000 | -0.847512000 | -0.516334000 |
| C | -0.516945000 | 3.125428000  | -0.038130000 |
| H | -0.998122000 | 3.816155000  | -0.728038000 |
| C | 1.334448000  | -1.113602000 | -0.688492000 |
| C | 0.858429000  | 3.028833000  | 0.017271000  |



|   |              |              |              |
|---|--------------|--------------|--------------|
| H | 1.496939000  | 3.639490000  | -0.613131000 |
| C | 2.751216000  | 0.404283000  | -2.501840000 |
| C | 5.517859000  | 1.164589000  | 0.319162000  |
| C | -3.671761000 | -2.664212000 | -0.670557000 |
| C | -5.894477000 | 4.368239000  | 0.516107000  |
| C | 4.928332000  | 2.297334000  | -0.333875000 |
| C | 3.403975000  | -0.588661000 | -1.753397000 |
| C | 3.467919000  | 1.136100000  | -3.431747000 |
| H | 2.965243000  | 1.913062000  | -3.995804000 |
| C | 3.350974000  | -1.000351000 | 3.133911000  |
| H | 4.405682000  | -1.187432000 | 2.950766000  |
| C | 3.190422000  | -4.069579000 | 1.542065000  |
| H | 2.608121000  | -4.647676000 | 2.250326000  |
| C | 1.271888000  | -1.454233000 | 4.272554000  |
| H | 0.709565000  | -2.007338000 | 5.020163000  |
| C | -6.124442000 | -2.734668000 | -0.838995000 |
| C | 3.308545000  | -2.326367000 | -0.114779000 |
| C | 6.870583000  | 0.855693000  | 0.059052000  |
| H | 7.286376000  | -0.014452000 | 0.562050000  |
| C | -4.861730000 | -3.355146000 | -0.896177000 |
| H | -4.795618000 | -4.413846000 | -1.126103000 |
| C | -5.736126000 | 4.950256000  | 1.930868000  |
| H | -6.060368000 | 4.227107000  | 2.687254000  |
| H | -6.347056000 | 5.855373000  | 2.033748000  |
| H | -4.696260000 | 5.220582000  | 2.142758000  |
| C | 4.688176000  | -2.526842000 | -0.268659000 |
| C | 5.733601000  | 3.079958000  | -1.190413000 |
| H | 5.264844000  | 3.938778000  | -1.664887000 |
| C | 4.566847000  | -4.252389000 | 1.390168000  |
| H | 5.064823000  | -5.008480000 | 1.988147000  |
| C | 2.639979000  | -1.720903000 | 4.073270000  |
| H | 3.136934000  | -2.488407000 | 4.661843000  |
| C | -7.380537000 | 4.084189000  | 0.278138000  |
| H | -7.557741000 | 3.684165000  | -0.726945000 |
| H | -7.948780000 | 5.015998000  | 0.374902000  |
| H | -7.777062000 | 3.371842000  | 1.010828000  |
| C | 5.324608000  | -3.494488000 | 0.492485000  |
| H | 6.392266000  | -3.641336000 | 0.377431000  |
| C | 4.773599000  | -0.845217000 | -1.928385000 |

|   |              |              |              |
|---|--------------|--------------|--------------|
| C | 4.829030000  | 0.861146000  | -3.604333000 |
| H | 5.394868000  | 1.446542000  | -4.321156000 |
| C | -7.429990000 | -3.499185000 | -1.082891000 |
| C | 7.634588000  | 1.632315000  | -0.804013000 |
| H | 8.676004000  | 1.378834000  | -0.986364000 |
| C | 5.490578000  | -0.123586000 | -2.868984000 |
| H | 6.552992000  | -0.304900000 | -2.978190000 |
| C | 7.061951000  | 2.752860000  | -1.429652000 |
| H | 7.661234000  | 3.368891000  | -2.095774000 |
| C | -5.433734000 | 5.413568000  | -0.513691000 |
| H | -4.384019000 | 5.689116000  | -0.366158000 |
| H | -6.037587000 | 6.324290000  | -0.419364000 |
| H | -5.545028000 | 5.029910000  | -1.533934000 |
| C | -8.169017000 | -2.884002000 | -2.283231000 |
| H | -9.108052000 | -3.421841000 | -2.462135000 |
| H | -7.557526000 | -2.945948000 | -3.190165000 |
| H | -8.412770000 | -1.830417000 | -2.109212000 |
| C | -7.191187000 | -4.983050000 | -1.378980000 |
| H | -8.154415000 | -5.479510000 | -1.541191000 |
| H | -6.690824000 | -5.486117000 | -0.543514000 |
| H | -6.585829000 | -5.122699000 | -2.282030000 |
| C | -8.324140000 | -3.397249000 | 0.164265000  |
| H | -8.569449000 | -2.355951000 | 0.399328000  |
| H | -7.826238000 | -3.834011000 | 1.036941000  |
| H | -9.264886000 | -3.935995000 | -0.002590000 |
| O | 5.396870000  | -1.801589000 | -1.180094000 |
| H | -2.716264000 | -3.175875000 | -0.737278000 |

T1-MIN -2677.09187671 Hartree

|   |              |              |              |
|---|--------------|--------------|--------------|
| O | 1.231822000  | -2.827814000 | 1.010321000  |
| O | 1.417204000  | 0.627496000  | -2.326145000 |
| N | -2.736833000 | -0.375221000 | -0.113597000 |
| N | 4.792085000  | 0.382344000  | 1.143738000  |
| N | 3.587528000  | 2.579864000  | -0.237617000 |
| N | 2.695807000  | -1.313138000 | -0.806308000 |
| C | -5.000847000 | -0.659604000 | -0.328472000 |
| C | 0.697619000  | 1.285995000  | 1.699440000  |
| C | -3.751060000 | -1.310250000 | -0.371704000 |
| C | 1.350964000  | 0.297568000  | 2.548813000  |

|   |              |              |              |
|---|--------------|--------------|--------------|
| C | -0.703550000 | 1.411764000  | 1.637085000  |
| H | -1.333019000 | 0.755155000  | 2.233636000  |
| C | 2.906758000  | 1.826594000  | 0.647921000  |
| C | -3.657776000 | 3.196352000  | 0.573450000  |
| H | -3.223669000 | 4.158985000  | 0.840192000  |
| C | 2.733061000  | 0.029955000  | 2.350106000  |
| C | 3.507092000  | 0.760119000  | 1.362126000  |
| C | -5.588405000 | 1.840339000  | 0.106557000  |
| H | -6.659050000 | 1.701266000  | -0.014272000 |
| C | -5.053671000 | 3.094893000  | 0.390571000  |
| C | -1.364746000 | -0.639882000 | -0.330645000 |
| C | -0.655442000 | 0.100242000  | -1.290621000 |
| H | -1.149003000 | 0.864542000  | -1.880146000 |
| C | -1.325877000 | 2.255181000  | 0.726688000  |
| C | -3.345586000 | 0.878448000  | 0.106992000  |
| C | -4.739169000 | 0.736600000  | -0.035249000 |
| C | -2.781354000 | 2.117069000  | 0.472939000  |
| C | 1.478653000  | 2.065774000  | 0.806879000  |
| C | 0.657710000  | -0.440569000 | 3.531613000  |
| H | -0.392748000 | -0.233664000 | 3.717211000  |
| C | 0.704262000  | -0.109734000 | -1.426636000 |
| C | 2.571506000  | -3.049324000 | 0.850888000  |
| C | -0.743163000 | -1.639968000 | 0.430684000  |
| H | -1.295272000 | -2.189578000 | 1.185633000  |
| C | 0.613657000  | -1.865845000 | 0.265833000  |
| C | -6.170315000 | -1.382003000 | -0.565890000 |
| H | -7.130518000 | -0.869835000 | -0.527638000 |
| C | -0.534467000 | 3.113757000  | -0.065922000 |
| H | -1.021333000 | 3.793753000  | -0.762230000 |
| C | 1.343859000  | -1.087963000 | -0.645227000 |
| C | 0.842013000  | 3.016437000  | -0.021001000 |
| H | 1.475074000  | 3.615502000  | -0.667929000 |
| C | 2.752222000  | 0.384099000  | -2.504120000 |
| C | 5.512496000  | 1.168017000  | 0.289379000  |
| C | -3.659083000 | -2.665570000 | -0.679526000 |
| C | -5.915062000 | 4.352432000  | 0.533547000  |
| C | 4.912742000  | 2.276759000  | -0.395720000 |
| C | 3.410277000  | -0.587575000 | -1.733029000 |
| C | 3.463375000  | 1.091097000  | -3.458205000 |

|   |              |              |              |
|---|--------------|--------------|--------------|
| H | 2.956586000  | 1.852022000  | -4.040245000 |
| C | 3.365997000  | -0.961584000 | 3.137605000  |
| H | 4.420657000  | -1.146364000 | 2.952526000  |
| C | 3.198665000  | -4.033089000 | 1.601976000  |
| H | 2.615611000  | -4.605138000 | 2.314542000  |
| C | 1.292319000  | -1.410494000 | 4.288229000  |
| H | 0.734952000  | -1.957895000 | 5.043621000  |
| C | -6.110768000 | -2.748815000 | -0.856839000 |
| C | 3.320154000  | -2.291339000 | -0.057965000 |
| C | 6.871867000  | 0.869845000  | 0.043098000  |
| H | 7.295970000  | 0.017920000  | 0.569393000  |
| C | -4.844166000 | -3.362203000 | -0.912087000 |
| H | -4.771595000 | -4.419637000 | -1.145951000 |
| C | -5.756465000 | 4.930951000  | 1.949712000  |
| H | -6.077001000 | 4.204507000  | 2.704526000  |
| H | -6.370264000 | 5.833703000  | 2.056261000  |
| H | -4.717155000 | 5.204197000  | 2.160691000  |
| C | 4.695828000  | -2.508185000 | -0.225726000 |
| C | 5.707389000  | 3.042332000  | -1.272035000 |
| H | 5.229229000  | 3.879598000  | -1.774565000 |
| C | 4.570358000  | -4.230444000 | 1.437732000  |
| H | 5.066086000  | -4.991428000 | 2.031473000  |
| C | 2.661230000  | -1.673026000 | 4.087853000  |
| H | 3.163106000  | -2.431966000 | 4.683254000  |
| C | -7.400448000 | 4.063428000  | 0.297385000  |
| H | -7.578033000 | 3.666618000  | -0.708896000 |
| H | -7.972201000 | 4.992592000  | 0.398840000  |
| H | -7.792645000 | 3.346608000  | 1.028036000  |
| C | 5.328035000  | -3.481737000 | 0.530966000  |
| H | 6.392345000  | -3.642740000 | 0.404099000  |
| C | 4.776354000  | -0.855473000 | -1.914748000 |
| C | 4.823087000  | 0.812529000  | -3.630773000 |
| H | 5.384934000  | 1.377682000  | -4.366776000 |
| C | -7.411018000 | -3.519665000 | -1.109468000 |
| C | 7.630428000  | 1.636719000  | -0.833872000 |
| H | 8.676517000  | 1.393821000  | -1.002964000 |
| C | 5.487518000  | -0.156912000 | -2.876065000 |
| H | 6.548261000  | -0.345284000 | -2.990511000 |
| C | 7.045686000  | 2.729446000  | -1.493164000 |

|   |              |              |              |
|---|--------------|--------------|--------------|
| H | 7.639045000  | 3.335720000  | -2.173155000 |
| C | -5.460338000 | 5.402644000  | -0.493975000 |
| H | -4.411532000 | 5.682185000  | -0.347436000 |
| H | -6.067767000 | 6.310616000  | -0.396078000 |
| H | -5.571721000 | 5.021417000  | -1.515113000 |
| C | -8.149073000 | -2.902826000 | -2.309573000 |
| H | -9.084284000 | -3.445171000 | -2.494899000 |
| H | -7.533686000 | -2.956603000 | -3.214399000 |
| H | -8.399549000 | -1.851543000 | -2.131211000 |
| C | -7.162609000 | -5.000622000 | -1.412185000 |
| H | -8.122344000 | -5.501686000 | -1.580904000 |
| H | -6.662767000 | -5.505165000 | -0.577297000 |
| H | -6.552763000 | -5.132144000 | -2.313432000 |
| C | -8.310667000 | -3.429359000 | 0.134615000  |
| H | -8.563016000 | -2.390720000 | 0.373969000  |
| H | -7.813567000 | -3.867581000 | 1.007023000  |
| H | -9.247591000 | -3.972777000 | -0.038600000 |
| O | 5.403074000  | -1.799440000 | -1.151975000 |
| H | -2.699531000 | -3.170313000 | -0.742847000 |

### TPXZ-2QX

S0-MIN -3553.87127801 Hartree

|   |              |              |              |
|---|--------------|--------------|--------------|
| O | 0.875965000  | -1.214918000 | 2.086036000  |
| O | 0.874850000  | 1.206616000  | -2.088783000 |
| N | -3.296520000 | -0.012017000 | -0.004359000 |
| N | 3.925083000  | 2.921167000  | 1.321372000  |
| N | 2.397282000  | -4.208379000 | 0.645064000  |
| N | 2.378415000  | 4.208026000  | -0.644595000 |
| N | 3.941779000  | -2.915863000 | -1.318911000 |
| N | 2.267751000  | -0.003374000 | -0.001200000 |
| C | -5.463053000 | -0.740603000 | -0.031890000 |
| C | -0.270248000 | 2.816203000  | 1.511488000  |
| C | -4.111162000 | -1.151327000 | -0.076391000 |
| C | 0.538373000  | 2.287794000  | 2.623508000  |
| C | -1.651439000 | 2.578646000  | 1.429285000  |
| H | -2.146821000 | 1.975578000  | 2.184457000  |
| C | 1.811047000  | 3.593833000  | 0.382953000  |
| C | -4.867887000 | 3.390239000  | 0.140306000  |

|   |              |              |              |
|---|--------------|--------------|--------------|
| H | -4.622220000 | 4.449324000  | 0.208596000  |
| C | 1.947637000  | 2.333622000  | 2.551791000  |
| C | 2.603483000  | 2.955498000  | 1.398587000  |
| C | -6.509139000 | 1.639980000  | 0.027087000  |
| H | -7.535173000 | 1.284183000  | -0.010191000 |
| C | -6.222867000 | 3.001949000  | 0.065374000  |
| C | -1.872056000 | -0.008144000 | -0.002993000 |
| C | -1.190282000 | 0.568775000  | -1.077999000 |
| H | -1.730132000 | 1.013501000  | -1.907976000 |
| C | -2.404515000 | 2.987460000  | 0.332412000  |
| C | -0.253775000 | -2.826768000 | -1.514661000 |
| C | 0.366452000  | -3.519350000 | -0.450607000 |
| C | -4.119087000 | 1.121590000  | 0.067729000  |
| C | 1.828974000  | -3.596786000 | -0.383519000 |
| C | 2.620472000  | -2.955511000 | -1.398114000 |
| C | 1.963770000  | -2.336134000 | -2.552186000 |
| C | -5.465929000 | 0.706683000  | 0.023395000  |
| C | -3.800276000 | 2.494709000  | 0.173813000  |
| C | 0.348693000  | 3.510604000  | 0.447840000  |
| C | -0.047433000 | 1.697889000  | 3.759253000  |
| H | -1.127776000 | 1.665453000  | 3.858119000  |
| C | 0.196543000  | 0.595587000  | -1.056491000 |
| C | -1.636012000 | -2.594418000 | -1.434163000 |
| H | -2.132765000 | -1.993051000 | -2.189780000 |
| C | 0.554412000  | -2.295213000 | -2.625531000 |
| C | 2.257468000  | -1.172974000 | 2.098875000  |
| C | 3.748895000  | -4.194269000 | 0.723404000  |
| C | -1.189840000 | -0.582677000 | 1.073083000  |
| H | -1.729478000 | -1.029841000 | 1.901885000  |
| C | -0.032056000 | -1.707258000 | -3.761951000 |
| H | -1.112398000 | -1.678651000 | -3.862053000 |
| C | 0.197041000  | -0.605211000 | 1.053371000  |
| C | -6.494262000 | -1.680352000 | -0.035214000 |
| H | -7.527525000 | -1.338345000 | 0.001372000  |
| C | -2.389324000 | -3.006430000 | -0.338512000 |
| C | -1.793798000 | 3.777330000  | -0.657344000 |
| H | -2.383459000 | 4.120989000  | -1.504015000 |
| C | 0.884068000  | -0.003975000 | -0.001259000 |
| C | -0.431864000 | 4.026142000  | -0.600416000 |

|   |              |              |              |
|---|--------------|--------------|--------------|
| H | 0.073671000  | 4.568583000  | -1.393024000 |
| C | 2.256570000  | 1.171201000  | -2.098533000 |
| C | -1.776642000 | -3.795164000 | 0.651154000  |
| H | -2.366118000 | -4.141965000 | 1.496690000  |
| C | -0.413723000 | -4.038596000 | 0.596157000  |
| H | 0.092693000  | -4.579624000 | 1.389174000  |
| C | 4.514137000  | 3.534361000  | 0.268084000  |
| C | -3.787082000 | -2.519426000 | -0.180726000 |
| C | -7.307003000 | 4.082759000  | 0.050474000  |
| C | 3.730174000  | 4.199481000  | -0.720794000 |
| C | 2.963051000  | 0.575786000  | -1.055023000 |
| C | 2.944289000  | 1.737322000  | -3.163802000 |
| H | 2.380331000  | 2.199178000  | -3.967468000 |
| C | 2.729983000  | 1.786515000  | 3.582905000  |
| H | 3.810296000  | 1.816733000  | 3.475732000  |
| C | 2.945495000  | -1.734658000 | 3.166291000  |
| H | 2.381932000  | -2.198000000 | 3.969378000  |
| C | 0.732832000  | 1.165792000  | 4.774813000  |
| H | 0.253000000  | 0.718057000  | 5.640727000  |
| C | -6.202085000 | -3.045777000 | -0.071574000 |
| C | 4.402084000  | -4.841688000 | 1.807472000  |
| H | 3.781657000  | -5.342995000 | 2.544777000  |
| C | 5.947025000  | -3.501430000 | -0.138335000 |
| H | 6.512344000  | -2.969737000 | -0.898265000 |
| C | 2.963460000  | -0.575982000 | 1.055942000  |
| C | 5.929771000  | 3.515258000  | 0.144244000  |
| H | 6.495988000  | 2.985456000  | 0.904823000  |
| C | 2.745420000  | -1.786214000 | -3.582338000 |
| H | 3.825712000  | -1.812785000 | -3.473914000 |
| C | 4.531703000  | -3.526391000 | -0.264488000 |
| C | 0.747548000  | -1.172323000 | -4.776537000 |
| H | 0.267177000  | -0.726197000 | -5.642989000 |
| C | -4.850372000 | -3.427637000 | -0.145870000 |
| H | -4.589781000 | -4.480759000 | -0.211588000 |
| C | -7.222567000 | 4.918934000  | 1.338552000  |
| H | -7.373744000 | 4.288321000  | 2.221597000  |
| H | -7.996230000 | 5.696497000  | 1.332661000  |
| H | -6.250003000 | 5.413117000  | 1.436262000  |
| C | 4.356130000  | -0.530745000 | 1.065278000  |

|   |              |              |              |
|---|--------------|--------------|--------------|
| C | 4.382482000  | 4.850122000  | -1.803477000 |
| H | 3.761231000  | 5.349196000  | -2.541598000 |
| C | 4.341247000  | -1.673182000 | 3.181109000  |
| H | 4.885426000  | -2.115111000 | 4.009942000  |
| C | 6.550080000  | -4.135015000 | 0.920072000  |
| H | 7.632163000  | -4.121594000 | 1.017005000  |
| C | 5.771718000  | -4.814203000 | 1.898089000  |
| H | 6.271913000  | -5.310302000 | 2.725167000  |
| C | 2.130650000  | 1.205476000  | 4.687498000  |
| H | 2.742148000  | 0.775750000  | 5.475852000  |
| C | -8.714133000 | 3.484927000  | -0.040376000 |
| H | -8.841586000 | 2.893102000  | -0.954169000 |
| H | -9.452872000 | 4.294027000  | -0.057117000 |
| H | -8.936180000 | 2.845205000  | 0.821581000  |
| C | 5.053307000  | -1.075056000 | 2.138437000  |
| H | 6.137849000  | -1.049096000 | 2.127971000  |
| C | 4.355935000  | 0.537220000  | -1.061311000 |
| C | 4.340321000  | 1.681943000  | -3.175896000 |
| H | 4.884226000  | 2.127183000  | -4.003134000 |
| C | 2.145394000  | -1.207115000 | -4.687579000 |
| H | 2.756324000  | -0.775203000 | -5.475182000 |
| C | -7.345983000 | -4.064866000 | -0.046987000 |
| C | 6.531923000  | 4.151888000  | -0.912821000 |
| H | 7.614206000  | 4.142986000  | -1.008002000 |
| C | 5.052887000  | 1.085967000  | -2.132356000 |
| H | 6.137511000  | 1.064893000  | -2.119641000 |
| C | 5.752356000  | 4.828364000  | -1.891791000 |
| H | 6.251876000  | 5.326929000  | -2.717791000 |
| C | -7.097036000 | 5.004187000  | -1.162841000 |
| H | -6.118959000 | 5.496291000  | -1.130722000 |
| H | -7.866632000 | 5.785589000  | -1.178825000 |
| H | -7.161845000 | 4.436650000  | -2.097757000 |
| C | -8.265427000 | -3.836358000 | -1.258343000 |
| H | -9.091691000 | -4.557719000 | -1.244945000 |
| H | -7.712349000 | -3.962328000 | -2.195605000 |
| H | -8.697340000 | -2.829713000 | -1.251413000 |
| C | -6.841561000 | -5.510417000 | -0.095492000 |
| H | -7.697386000 | -6.194115000 | -0.065674000 |
| H | -6.196619000 | -5.741536000 | 0.760104000  |



|   |              |              |              |
|---|--------------|--------------|--------------|
| H | -6.282312000 | -5.712741000 | -1.016115000 |
| C | -8.162002000 | -3.884759000 | 1.244156000  |
| H | -8.587370000 | -2.877701000 | 1.313333000  |
| H | -7.534634000 | -4.049595000 | 2.127093000  |
| H | -8.990147000 | -4.603648000 | 1.269532000  |
| O | 5.057320000  | 0.004156000  | 0.002376000  |

S1-MIN -3553.80080348 Hartree

|   |              |              |              |
|---|--------------|--------------|--------------|
| O | -0.910540000 | 1.041638000  | 2.125598000  |
| O | -0.846532000 | -1.297881000 | -2.074652000 |
| N | 3.279904000  | 0.033373000  | 0.004379000  |
| N | -3.721522000 | -2.807081000 | 1.342170000  |
| N | -2.628895000 | 4.054408000  | 0.678673000  |
| N | -2.180617000 | -4.187653000 | -0.639622000 |
| N | -4.134222000 | 2.797201000  | -1.336628000 |
| N | -2.272428000 | -0.118846000 | -0.002999000 |
| C | 5.394025000  | 0.907084000  | -0.052134000 |
| C | 0.495658000  | -2.869921000 | 1.573720000  |
| C | 4.018296000  | 1.229727000  | -0.056150000 |
| C | -0.289632000 | -2.362181000 | 2.690993000  |
| C | 1.878104000  | -2.627453000 | 1.460924000  |
| H | 2.385788000  | -2.036264000 | 2.219966000  |
| C | -1.613141000 | -3.578763000 | 0.425000000  |
| C | 5.089479000  | -3.255802000 | 0.066324000  |
| H | 4.918746000  | -4.329307000 | 0.133030000  |
| C | -1.706040000 | -2.371222000 | 2.591947000  |
| C | -2.376969000 | -2.932362000 | 1.427817000  |
| C | 6.603068000  | -1.394175000 | -0.065805000 |
| H | 7.600341000  | -0.966258000 | -0.118443000 |
| C | 6.412004000  | -2.772588000 | -0.040908000 |
| C | 1.862528000  | -0.051827000 | 0.020609000  |
| C | 1.199059000  | -0.652268000 | -1.055484000 |
| H | 1.751494000  | -1.077580000 | -1.885730000 |
| C | 2.600607000  | -2.995067000 | 0.335224000  |
| C | 0.065639000  | 2.746413000  | -1.471979000 |
| C | -0.578579000 | 3.419111000  | -0.408787000 |
| C | 4.186881000  | -1.047899000 | 0.029901000  |
| C | -2.041372000 | 3.481297000  | -0.361901000 |
| C | -2.812282000 | 2.860081000  | -1.402461000 |

|   |              |              |              |
|---|--------------|--------------|--------------|
| C | -2.133765000 | 2.265886000  | -2.557326000 |
| C | 5.496088000  | -0.537303000 | -0.032207000 |
| C | 3.963925000  | -2.437617000 | 0.135680000  |
| C | -0.160369000 | -3.517019000 | 0.494114000  |
| C | 0.300700000  | -1.818372000 | 3.852388000  |
| H | 1.382028000  | -1.826426000 | 3.959040000  |
| C | -0.184926000 | -0.711656000 | -1.038954000 |
| C | 1.453884000  | 2.555109000  | -1.384150000 |
| H | 1.978748000  | 1.986636000  | -2.146145000 |
| C | -0.722629000 | 2.210168000  | -2.596133000 |
| C | -2.277600000 | 1.011478000  | 2.119165000  |
| C | -3.979527000 | 4.017446000  | 0.744085000  |
| C | 1.165151000  | 0.501584000  | 1.103945000  |
| H | 1.695390000  | 0.952375000  | 1.935722000  |
| C | -0.116664000 | 1.615793000  | -3.719665000 |
| H | 0.964941000  | 1.563997000  | -3.791306000 |
| C | -0.217385000 | 0.477390000  | 1.094842000  |
| C | 6.363266000  | 1.909178000  | -0.059562000 |
| H | 7.415887000  | 1.630727000  | -0.054435000 |
| C | 2.187890000  | 2.985729000  | -0.282197000 |
| C | 1.964476000  | -3.759622000 | -0.667079000 |
| H | 2.536499000  | -4.079468000 | -1.535878000 |
| C | -0.894639000 | -0.133966000 | 0.026375000  |
| C | 0.609397000  | -4.012515000 | -0.583500000 |
| H | 0.079163000  | -4.537369000 | -1.372001000 |
| C | -2.212666000 | -1.254149000 | -2.118429000 |
| C | 1.545870000  | 3.743114000  | 0.713624000  |
| H | 2.121496000  | 4.104258000  | 1.562354000  |
| C | 0.178165000  | 3.948154000  | 0.650860000  |
| H | -0.348073000 | 4.473830000  | 1.441197000  |
| C | -4.317482000 | -3.442993000 | 0.286981000  |
| C | 3.609847000  | 2.574812000  | -0.137000000 |
| C | 7.567832000  | -3.774707000 | -0.097668000 |
| C | -3.544985000 | -4.146956000 | -0.696124000 |
| C | -2.942469000 | -0.674247000 | -1.067478000 |
| C | -2.886218000 | -1.777295000 | -3.207551000 |
| H | -2.318785000 | -2.237109000 | -4.008376000 |
| C | -2.477148000 | -1.841140000 | 3.652183000  |
| H | -3.557778000 | -1.854768000 | 3.537170000  |

|   |              |              |              |
|---|--------------|--------------|--------------|
| C | -2.983055000 | 1.546360000  | 3.185553000  |
| H | -2.436473000 | 1.981459000  | 4.014257000  |
| C | -0.469611000 | -1.300228000 | 4.878305000  |
| H | 0.011104000  | -0.897047000 | 5.765687000  |
| C | 5.986619000  | 3.254689000  | -0.063183000 |
| C | -4.650377000 | 4.610460000  | 1.848708000  |
| H | -4.044787000 | 5.102753000  | 2.604021000  |
| C | -6.158255000 | 3.297455000  | -0.148095000 |
| H | -6.710181000 | 2.782844000  | -0.929145000 |
| C | -2.975008000 | 0.437007000  | 1.048683000  |
| C | -5.721680000 | -3.394924000 | 0.145476000  |
| H | -6.278086000 | -2.848070000 | 0.903509000  |
| C | -2.897039000 | 1.746814000  | -3.617322000 |
| H | -3.978906000 | 1.798228000  | -3.541615000 |
| C | -4.743320000 | 3.365270000  | -0.270378000 |
| C | -0.878017000 | 1.103600000  | -4.759707000 |
| H | -0.382150000 | 0.654085000  | -5.615268000 |
| C | 4.613654000  | 3.550143000  | -0.105573000 |
| H | 4.284617000  | 4.584921000  | -0.151610000 |
| C | 7.575446000  | -4.628783000 | 1.181347000  |
| H | 7.706068000  | -3.999147000 | 2.068339000  |
| H | 8.400897000  | -5.350178000 | 1.145061000  |
| H | 6.642667000  | -5.190644000 | 1.297702000  |
| C | -4.376759000 | 0.394127000  | 1.033257000  |
| C | -4.222568000 | -4.784614000 | -1.758565000 |
| H | -3.615112000 | -5.317472000 | -2.486294000 |
| C | -4.378288000 | 1.475225000  | 3.172258000  |
| H | -4.933442000 | 1.887347000  | 4.008633000  |
| C | -6.777572000 | 3.871334000  | 0.934164000  |
| H | -7.858468000 | 3.823430000  | 1.030446000  |
| C | -6.017986000 | 4.536518000  | 1.938006000  |
| H | -6.532834000 | 4.986795000  | 2.781878000  |
| C | -1.873849000 | -1.311922000 | 4.775867000  |
| H | -2.482285000 | -0.907644000 | 5.581378000  |
| C | 8.927144000  | -3.079372000 | -0.217665000 |
| H | 8.987990000  | -2.469049000 | -1.126207000 |
| H | 9.719219000  | -3.834914000 | -0.265662000 |
| H | 9.128480000  | -2.436526000 | 0.647081000  |
| C | -5.085669000 | 0.906690000  | 2.109155000  |

|   |              |              |              |
|---|--------------|--------------|--------------|
| H | -6.168854000 | 0.874986000  | 2.092525000  |
| C | -4.345265000 | -0.617409000 | -1.102950000 |
| C | -4.281603000 | -1.692801000 | -3.242122000 |
| H | -4.812013000 | -2.111476000 | -4.090839000 |
| C | -2.277060000 | 1.171536000  | -4.713401000 |
| H | -2.872323000 | 0.767570000  | -5.527223000 |
| C | 7.064227000  | 4.343131000  | -0.044850000 |
| C | -6.360158000 | -4.019503000 | -0.918867000 |
| H | -7.442920000 | -3.973567000 | -1.006646000 |
| C | -5.019442000 | -1.114398000 | -2.206665000 |
| H | -6.102560000 | -1.091865000 | -2.219163000 |
| C | -5.604984000 | -4.719331000 | -1.875201000 |
| H | -6.103727000 | -5.217615000 | -2.703096000 |
| C | 7.388422000  | -4.694475000 | -1.317111000 |
| H | 6.447743000  | -5.253075000 | -1.265638000 |
| H | 8.209246000  | -5.420496000 | -1.363258000 |
| H | 7.389012000  | -4.113407000 | -2.246004000 |
| C | 7.964319000  | 4.195733000  | -1.283017000 |
| H | 8.743756000  | 4.967320000  | -1.274553000 |
| H | 7.380744000  | 4.304742000  | -2.203762000 |
| H | 8.458517000  | 3.218490000  | -1.307271000 |
| C | 6.468661000  | 5.754351000  | -0.050689000 |
| H | 7.280237000  | 6.489983000  | -0.024352000 |
| H | 5.830513000  | 5.926553000  | 0.823724000  |
| H | 5.877220000  | 5.940137000  | -0.954573000 |
| C | 7.922516000  | 4.189123000  | 1.222011000  |
| H | 8.412649000  | 3.210261000  | 1.259111000  |
| H | 7.309231000  | 4.296310000  | 2.123475000  |
| H | 8.703816000  | 4.958602000  | 1.242151000  |
| O | -5.043279000 | -0.105428000 | -0.046666000 |

T1-MIN -3553.80371077 Hartree

|   |              |              |              |
|---|--------------|--------------|--------------|
| O | -0.908360000 | 1.026901000  | 2.128494000  |
| O | -0.843437000 | -1.289356000 | -2.085251000 |
| N | 3.284930000  | 0.029540000  | 0.001941000  |
| N | -3.747917000 | -2.773161000 | 1.341942000  |
| N | -2.606418000 | 4.055688000  | 0.678576000  |
| N | -2.213680000 | -4.143403000 | -0.646895000 |
| N | -4.111411000 | 2.796182000  | -1.335749000 |

|   |              |              |              |
|---|--------------|--------------|--------------|
| N | -2.269624000 | -0.145020000 | 0.004222000  |
| C | 5.405401000  | 0.887628000  | -0.052649000 |
| C | 0.470470000  | -2.847169000 | 1.567054000  |
| C | 4.031753000  | 1.219764000  | -0.059688000 |
| C | -0.312674000 | -2.332790000 | 2.683527000  |
| C | 1.854669000  | -2.616199000 | 1.457681000  |
| H | 2.366667000  | -2.032044000 | 2.218995000  |
| C | -1.642127000 | -3.546946000 | 0.417708000  |
| C | 5.065105000  | -3.272999000 | 0.075691000  |
| H | 4.885013000  | -4.344877000 | 0.143769000  |
| C | -1.730179000 | -2.342335000 | 2.587316000  |
| C | -2.401873000 | -2.899945000 | 1.425991000  |
| C | 6.596077000  | -1.424902000 | -0.057646000 |
| H | 7.597447000  | -1.006591000 | -0.109961000 |
| C | 6.392376000  | -2.801400000 | -0.028855000 |
| C | 1.866603000  | -0.052451000 | 0.018943000  |
| C | 1.201354000  | -0.640332000 | -1.066205000 |
| H | 1.754605000  | -1.055556000 | -1.901163000 |
| C | 2.576682000  | -2.987555000 | 0.332001000  |
| C | 0.088239000  | 2.746631000  | -1.471746000 |
| C | -0.555752000 | 3.416092000  | -0.406456000 |
| C | 4.183417000  | -1.057003000 | 0.032114000  |
| C | -2.018512000 | 3.478878000  | -0.359850000 |
| C | -2.789280000 | 2.856943000  | -1.400160000 |
| C | -2.110904000 | 2.263935000  | -2.555678000 |
| C | 5.496937000  | -0.557501000 | -0.028795000 |
| C | 3.947166000  | -2.444297000 | 0.138637000  |
| C | -0.187888000 | -3.492554000 | 0.487654000  |
| C | 0.279088000  | -1.786986000 | 3.842409000  |
| H | 1.360557000  | -1.792783000 | 3.947184000  |
| C | -0.180141000 | -0.705461000 | -1.048145000 |
| C | 1.476429000  | 2.555376000  | -1.384927000 |
| H | 2.000645000  | 1.987948000  | -2.148182000 |
| C | -0.699786000 | 2.212718000  | -2.596929000 |
| C | -2.274894000 | 1.001662000  | 2.117760000  |
| C | -3.957246000 | 4.021942000  | 0.741672000  |
| C | 1.169015000  | 0.492594000  | 1.105231000  |
| H | 1.698096000  | 0.940761000  | 1.939276000  |
| C | -0.093638000 | 1.624293000  | -3.723466000 |

|   |              |              |              |
|---|--------------|--------------|--------------|
| H | 0.988033000  | 1.576953000  | -3.797166000 |
| C | -0.214217000 | 0.464047000  | 1.097324000  |
| C | 6.380865000  | 1.883943000  | -0.059023000 |
| H | 7.431790000  | 1.599146000  | -0.051579000 |
| C | 2.210993000  | 2.982935000  | -0.282324000 |
| C | 1.936821000  | -3.745166000 | -0.672308000 |
| H | 2.507014000  | -4.066589000 | -1.541565000 |
| C | -0.891392000 | -0.146283000 | 0.027727000  |
| C | 0.579392000  | -3.989253000 | -0.589867000 |
| H | 0.046664000  | -4.508023000 | -1.380829000 |
| C | -2.209843000 | -1.252803000 | -2.125130000 |
| C | 1.569373000  | 3.737394000  | 0.715939000  |
| H | 2.145167000  | 4.095961000  | 1.565663000  |
| C | 0.201501000  | 3.942285000  | 0.654336000  |
| H | -0.324518000 | 4.465733000  | 1.446326000  |
| C | -4.349006000 | -3.414678000 | 0.295402000  |
| C | 3.631755000  | 2.567387000  | -0.139029000 |
| C | 7.539188000  | -3.814202000 | -0.080016000 |
| C | -3.580859000 | -4.111773000 | -0.695590000 |
| C | -2.940776000 | -0.683808000 | -1.069193000 |
| C | -2.883059000 | -1.771817000 | -3.216934000 |
| H | -2.314634000 | -2.222939000 | -4.022052000 |
| C | -2.500154000 | -1.809571000 | 3.648368000  |
| H | -3.580943000 | -1.823433000 | 3.535759000  |
| C | -2.981226000 | 1.552682000  | 3.176871000  |
| H | -2.434219000 | 1.993729000  | 4.002160000  |
| C | -0.489881000 | -1.266522000 | 4.868755000  |
| H | -0.007362000 | -0.860809000 | 5.753944000  |
| C | 6.012595000  | 3.231747000  | -0.063895000 |
| C | -4.628933000 | 4.621429000  | 1.842313000  |
| H | -4.023545000 | 5.114616000  | 2.597220000  |
| C | -6.136325000 | 3.305771000  | -0.152842000 |
| H | -6.687921000 | 2.789898000  | -0.933312000 |
| C | -2.972725000 | 0.420700000  | 1.050550000  |
| C | -5.755643000 | -3.375717000 | 0.166546000  |
| H | -6.308969000 | -2.833591000 | 0.929944000  |
| C | -2.874283000 | 1.745236000  | -3.615839000 |
| H | -3.956208000 | 1.792569000  | -3.538008000 |
| C | -4.720856000 | 3.368344000  | -0.271944000 |

|   |              |              |              |
|---|--------------|--------------|--------------|
| C | -0.855007000 | 1.112672000  | -4.763720000 |
| H | -0.359112000 | 0.667777000  | -5.621700000 |
| C | 4.641384000  | 3.536301000  | -0.107110000 |
| H | 4.319080000  | 4.573218000  | -0.152691000 |
| C | 7.535243000  | -4.665569000 | 1.200821000  |
| H | 7.669113000  | -4.035254000 | 2.086848000  |
| H | 8.354089000  | -5.394641000 | 1.168483000  |
| H | 6.596992000  | -5.218590000 | 1.315668000  |
| C | -4.374909000 | 0.387236000  | 1.030433000  |
| C | -4.260639000 | -4.748277000 | -1.754292000 |
| H | -3.655958000 | -5.272465000 | -2.490447000 |
| C | -4.375856000 | 1.489965000  | 3.159362000  |
| H | -4.931636000 | 1.914616000  | 3.989102000  |
| C | -6.756505000 | 3.886508000  | 0.925260000  |
| H | -7.837836000 | 3.843018000  | 1.018851000  |
| C | -5.997036000 | 4.552868000  | 1.928367000  |
| H | -6.512358000 | 5.008519000  | 2.769084000  |
| C | -1.894345000 | -1.279082000 | 4.769744000  |
| H | -2.500885000 | -0.872838000 | 5.575633000  |
| C | 8.905182000  | -3.131633000 | -0.197403000 |
| H | 8.974491000  | -2.524169000 | -1.107248000 |
| H | 9.690447000  | -3.894517000 | -0.241040000 |
| H | 9.109637000  | -2.488489000 | 0.666383000  |
| C | -5.083467000 | 0.915123000  | 2.099057000  |
| H | -6.166812000 | 0.892118000  | 2.078343000  |
| C | -4.343038000 | -0.623988000 | -1.105425000 |
| C | -4.278520000 | -1.693687000 | -3.248445000 |
| H | -4.809064000 | -2.109426000 | -4.098564000 |
| C | -2.254240000 | 1.175125000  | -4.714514000 |
| H | -2.849579000 | 0.771123000  | -5.528280000 |
| C | 7.097180000  | 4.313301000  | -0.045044000 |
| C | -6.398597000 | -4.007044000 | -0.891146000 |
| H | -7.482478000 | -3.971051000 | -0.968191000 |
| C | -5.016624000 | -1.120144000 | -2.209506000 |
| H | -6.099819000 | -1.098147000 | -2.221672000 |
| C | -5.646832000 | -4.697162000 | -1.855940000 |
| H | -6.148715000 | -5.197812000 | -2.680340000 |
| C | 7.355202000  | -4.735005000 | -1.298022000 |
| H | 6.409510000  | -5.285240000 | -1.248122000 |

|   |              |              |              |
|---|--------------|--------------|--------------|
| H | 8.169733000  | -5.468319000 | -1.340285000 |
| H | 7.363551000  | -4.155936000 | -2.228122000 |
| C | 7.997610000  | 4.159499000  | -1.282202000 |
| H | 8.782039000  | 4.926028000  | -1.273399000 |
| H | 7.415655000  | 4.271759000  | -2.203585000 |
| H | 8.485446000  | 3.179033000  | -1.305459000 |
| C | 6.510737000  | 5.728342000  | -0.052382000 |
| H | 7.327023000  | 6.458764000  | -0.026090000 |
| H | 5.873114000  | 5.905351000  | 0.821454000  |
| H | 5.921060000  | 5.917180000  | -0.956787000 |
| C | 7.953279000  | 4.154773000  | 1.222746000  |
| H | 8.437125000  | 3.172829000  | 1.261018000  |
| H | 7.339781000  | 4.266466000  | 2.123523000  |
| H | 8.739457000  | 4.919282000  | 1.243159000  |
| O | -5.042457000 | -0.110221000 | -0.050291000 |
